1 ***Genome-based targeted sequencing as a reproducible microbial community profiling assay.***

2

3 Jacquelynn Benjamino, Benjamin Leopold, Daniel Phillips<sup>□</sup>, and Mark D. Adams\*

4

5 The Jackson Laboratory for Genomic Medicine, Farmington, CT

6 <sup>□</sup>Current address: Department of Molecular and Cell Biology, University of Connecticut, Storrs,  
7 CT.

8

9 Author Contributions: JB, DP, MDA contributed to the development of experimental design. JB  
10 performed sample preparation and data analysis. JB, BL developed probe design pipeline. JB,  
11 MDA wrote the manuscript.

12

13 \*Corresponding author:

14 The Jackson Laboratory for Genomic Medicine

15 10 Discovery Dr.

16 Farmington, CT 06032

17 [mark.adams@jax.org](mailto:mark.adams@jax.org)

18

19

20

21 **Abstract**

22           Current sequencing-based methods for profiling microbial communities rely on marker  
23 gene (e.g. 16S rRNA) or metagenome shotgun sequencing (mWGS) analysis. We present a new  
24 approach based on highly multiplexed oligonucleotide probes designed from reference  
25 genomes in a pooled primer-extension reaction during library construction to derive relative  
26 abundance data. This approach, termed MA-GenTA: Microbial Abundances from Genome  
27 Tagged Analysis, enables quantitative, straightforward, cost-effective microbiome profiling that  
28 combines desirable features of both 16S rRNA and mWGS strategies. To test the utility of the  
29 MA-GenTA assay, probes were designed for 830 genome sequences representing bacteria  
30 present in mouse stool specimens. Comparison of the MA-GenTA data with mWGS data  
31 demonstrated excellent correlation down to 0.01% relative abundance and a similar number of  
32 organisms detected per sample. Despite the incompleteness of the reference database, NMDS  
33 clustering based on the Bray-Curtis dissimilarity metric of sample groups was consistent  
34 between MA-GenTA, mWGS and 16S rRNA datasets. MA-GenTA represents a potentially useful  
35 new method for microbiome community profiling based on reference genomes.

36

37

## 38 Main

39 The primary molecular methods for determining microbial composition are based on  
40 marker gene sequencing or whole metagenome shotgun sequencing (mWGS). The 16S  
41 ribosomal RNA (rRNA) marker gene has been widely used for bacterial profiling for decades  
42 across diverse ecosystems<sup>1,2</sup>. Using this method, taxonomic classification of the bacterial  
43 community can be obtained at modest cost and a resolution that ranges from sub-species to  
44 family level, depending on the 16S rRNA segment that is sequenced<sup>3-6</sup>. Continued reduction in  
45 the cost of DNA sequencing has meant that mWGS approaches have become increasingly  
46 common due to the greater information on gene content, taxonomic resolution, and strain-  
47 level variation<sup>7</sup>, despite higher cost and complexity of data analysis.

48 The Human Microbiome Project<sup>8</sup> and similar large-scale investments<sup>9</sup> established  
49 methods and reference datasets for characterization of microbial profiles across diverse human  
50 body sites. As a result, the tools and reference genome datasets for characterizing human  
51 microbiomes are much better developed than for those involving other organisms. The mouse  
52 is widely used in microbiome studies that seek to demonstrate a causal role of microbes  
53 affecting a given trait and to understand the mechanisms by which microbes contribute to  
54 phenotypes<sup>10</sup>. The vast majority of mWGS sequences from mouse gut samples have no matches  
55 to named organisms in public databases<sup>11</sup>, substantially limiting the informativeness of this  
56 approach.

57 One approach to the limited reference genome sequences is construction of *in silico*  
58 genomes based on computational sequence assembly of large mWGS datasets to create  
59 “metagenome assembled genomes” or MAGs<sup>12-14</sup>. The integrated Mouse Gut Metagenomic  
60 Catalog (iMGMC)<sup>15</sup> is one such effort. Combining 1.3 Tbp of data from 298 mouse metagenomic  
61 libraries, Lesker, *et al.* assembled 1.2 million contigs; a subset of these could be grouped into  
62 830 high quality MAGs (hqMAGs) that are predicted to be >90% complete and <5%  
63 contaminated based on the representation of single copy genes<sup>16</sup>.

64 Here we describe a new approach to metagenome profiling termed MA-GenTA  
65 (Microbial Abundances from Genome Tagged Analysis) that combines the specificity of mWGS  
66 analysis with a simplified laboratory and analytical workflow (Figure 1). The availability of

67 custom-designed highly multiplexed pools of oligonucleotides (“oligos”) has opened  
68 possibilities for a range of new assay methods to specifically target microbes at the species,  
69 strain, and even gene level. We adapted the Allegro Targeted Genotyping assay’s single primer  
70 enrichment technology that is widely used for genotyping<sup>17,18</sup> and implemented it as a  
71 quantitative, straightforward, and cost-effective method for profiling mouse microbial  
72 communities based on the iMGMC hqMAGs.

73

## 74 **Results**

75         The MA-GenTA assay is based on approximating the relative abundance of hundreds of  
76 microbial species using sets of probes designed to be unique to each genome. The approach  
77 includes design of compatible probes directed at the genomes (or genes) of interest, library  
78 construction that uses the probe pools in a primer extension reaction, and integration of data  
79 across multiple probes to determine species abundance (Fig. 1). Oligonucleotide probe sets  
80 were designed using 830 iMGMC hqMAGs<sup>15</sup>. Preliminary results using a padlock probe  
81 design<sup>19,20</sup> suggested that 20 probes per genome were sufficient to provide quantitative relative  
82 abundance information (data not shown). The padlock probe assay does not allow decoding of  
83 any additional adjacent sequence data for confirmation of probe specificity. We therefore  
84 sought to develop a method based on a single-primer extension assay, in which sequence  
85 adjacent to each probe is determined, allowing confirmation that the probe did in fact bind to  
86 the intended target.

87         Computational analysis suggests that each hqMAG is consistent with representing a  
88 single bacterial species and about 12% of hqMAGs are concordant with genome sequences of  
89 bacterial isolates that are present in GenBank. Most, though do not correspond with isolated  
90 bacteria, so in considering a probe design strategy, we decided to develop two completely  
91 independent probe sets for each hqMAG. We reasoned that concordance of relative abundance  
92 between these probe sets would provide additional support for the conjecture that the  
93 hqMAGs are reasonable approximations of *bona fide* genome sequences and that the  
94 organisms they represent are commonly found in the mouse gut.

95 Two defined-composition genomic DNA positive controls and a no-template negative  
96 control (NTC) were initially used to assess the specificity of each probe set. *Escherichia coli*  
97 gDNA and the ZymoBIOMICS Microbial Community Standard (Mock), which contains three  
98 species present in the iMGMC hqMAG set, one of which is an *E. coli* strain, were used as the  
99 positive controls.

100 Alignment of primary sequence reads showed that probes from many MAGs were  
101 detected for the Allegro and JAX designs for *E. coli* (493, 751), and Mock (264, 315) samples  
102 (grey dots in Fig. 2a). The vast majority of the MAGs matched in the *E. coli* and Mock samples  
103 were represented by a small number of probes with low relative abundance. After applying a  
104 probe-abundance threshold of  $\geq 0.001\%$  (Supplementary Fig. 1), there was only 1 MAG  
105 represented by  $>10$  probes for both the Allegro and JAX designs in the *E. coli* sample and 3 and  
106 2 MAGs for the Allegro and JAX designs in the Mock sample as expected (colored dots in Fig.  
107 2a). For the *E. coli* sample, 99.95% and 99.28% of reads mapped to the *E. coli* genome for the  
108 Allegro and JAX designs, respectively. For the Mock community sample, 99.92% and 98.36% of  
109 reads mapped to the three genomes present in the Allegro design and two in the JAX design,  
110 respectively.

111 In negative control samples, only a few thousand reads were obtained. NTC reads  
112 corresponded to 179 and 312 different probes and 77 and 138 MAGs in the Allegro and JAX  
113 designs, respectively (Fig. 2a). Of these probes, 94 (Allegro) and 142 (JAX) from *E. coli*  
114 overlapped with the NTC probes and 66 (Allegro) and 96 (JAX) from the Mock overlapped with  
115 the probes in the NTC. There are several potential sources of these reads: 1) contamination of  
116 the NTC with mouse stool DNA that was processed on the same batch; 2) contamination of the  
117 reagents used for library preparation; 3) self-annealing of primers within the probe set; or 4)  
118 sequencing-associated barcode-hopping. While there were many MAGs detected in the NTC,  
119 most of those MAGs were represented by only a few probes. No MAGs in the Allegro design  
120 and only one MAG in the JAX design had more than 10 probes represented (Fig. 2a). The MAG  
121 detected in the JAX dataset (single-China\_7-4\_110307.52) is a Muribaculaceae and present at  
122 high abundance in the majority of mouse samples.

123           The Allegro and JAX probe sets have no sequence overlap, thus they represent two  
124 completely independent assays for relative abundance of hqMAGs in mouse specimens. High  
125 concordance in probe representation and relative abundance would therefore support both the  
126 reliability of the MA-GenTA assay and the structural validity of the detected MAGs as  
127 representing a species present in the test sample. The Allegro and JAX probe sets were used to  
128 assay 72 mouse stool pellet samples, averaging 3.7 million sequencing reads per sample (Table  
129 1, Supplementary Table 1). All reads for both datasets were mapped to the iMGMC hqMAGs  
130 reference. After mapping, reads that mapped to multiple regions were removed to produce  
131 uniquely mapped reads. The uniquely mapped reads were then filtered to include only reads  
132 that aligned adjacent to the designed probe region; this allowed us to determine probe-derived  
133 (on-target) reads. The two probe sets yielded similar numbers of sequencing reads and mapped  
134 reads (Fig. 2b). There was a larger variation in the proportion of uniquely mapped reads and  
135 fewer on-target reads in the Allegro dataset compared to the JAX dataset, suggesting that the  
136 JAX design pipeline may be more effective in selecting unique regions of each MAG. The  
137 previously chosen 0.001% minimum probe-abundance and 10 probes per MAG (ppM)  
138 thresholds were applied to the mouse samples (Fig. 2c). The number of MAGs observed in the  
139 mouse samples after applying the thresholds decreased by ~50% (Fig. 2d). However, over 90%  
140 of the reads matched MAGs present above the thresholds (Fig. 2d).

141           Comparison of the MAG abundances between the two designs without a probe  
142 abundance threshold gave a Pearson correlation coefficient of 0.98, demonstrating that the  
143 MAG abundance as measured by the Allegro and JAX probe sets were highly consistent (Fig.  
144 3a). The points on the plot are colored by the number of probes detected in each MAG in both  
145 probe sets, showing higher abundance and better concordance between the probe sets for  
146 MAGs with reads from 10 or more probes. The MAGs were also plotted based on the number of  
147 probes detected in each dataset across all mouse samples, illustrating that MAGs tend to have  
148 high or low probe representation in both probe sets (Fig. 3b).

149

150 *Comparison of the MA-GenTA assay to other microbial community profiling assays*

151 mWGS data was available for 69 mouse fecal samples, enabling correlation of relative  
152 abundance data for each MAG between the two assays. MAGs were separated into groups  
153 based on the number of probes observed by MA-GenTA in each sample (e.g. from 1 to 20) and  
154 a Pearson correlation was performed on each group of MAGs between the MA-GenTA and  
155 mWGS abundance data (Fig. 3c and Supplementary Fig. 2, 3, Supplementary Table 2). For both  
156 the Allegro and JAX datasets, MAGs with  $\geq 15$  probes detected have relative abundance  
157 correlations of  $R \geq 0.9$  to the mWGS data. MAGs represented by less than 10 probes had poor  
158 Pearson correlations between the relative abundance of MA-GenTA and mWGS data ( $R \leq 0.23$   
159 for Allegro and  $R \leq 0.52$  for JAX). Poor correlation of MAGs with fewer probes could be due to  
160 poor probe performance, improperly assembled MAGs, pan-genome differences between the  
161 MAG and the organisms present in our samples, sequencing depth disparities between the MA-  
162 GenTA assay and mWGS, or inflated abundance values in mWGS caused by read-mapping  
163 hotspots or conserved regions.

164 16S rRNA gene sequencing, mWGS, and the MA-GenTA assay are distinct ways of  
165 determining the number of bacterial species present in a sample. We compared the number of  
166 observed MAGs from the MA-GenTA assay with the number of 16S rRNA v1-v3 OTUs and MAGs  
167 detected in the mWGS data across the mouse samples from three studies (Fig. 3d-g). A MAG  
168 was considered present if at least 10 probes had  $>0.001\%$  probe abundance. These thresholds  
169 were used in subsequent analyses of mouse stool datasets. The sensitivity to detect a MAG  
170 depends upon sequencing depth (more reads means it is more likely reads from a low-  
171 abundance genome will be detected) and probe representation (if a MAG truly represents the  
172 genome of a species present in the sample, then reads from a large fraction of probes should  
173 be observed).

174 All the datasets were filtered with MAG/OTU relative abundance thresholds of 0.1%,  
175 0.01%, 0.001%, and no threshold. The total number of MAGs across the all HLB samples was  
176 compared between the MA-GenTA (JAX and Allegro) assay and mWGS at each threshold (Fig.  
177 3d). There was a steep increase in the number of mWGS MAGs as thresholds were lowered,  
178 while the MAGs in the JAX and Allegro assays increased slightly. The Venn diagram for each  
179 threshold shows high overlap of MAGs detected between JAX and Allegro MA-GenTA datasets,

180 with an increasing number of low-abundance MAGs detected only in the mWGS assay. Within  
181 the HLB dataset, the Allegro and JAX MA-GenTA datasets yielded similar numbers of MAGs,  
182 which were also similar to the number of 16S OTUs across all thresholds on a per-sample basis  
183 (Fig. 3e). The mWGS data detected similar numbers of MAGs to the 16S and targeted data for  
184 the 0.1% and 0.01% relative abundance thresholds, but much larger numbers at the 0.001%  
185 cutoff and without an abundance threshold. This observation is consistent with data shown in  
186 Supplementary Fig. 4 where many MAGs had  $\geq 0.01\%$  relative abundance in the mWGS data  
187 (yellow tones), but lower abundance and  $<10$  probes per MAG in both MA-GenTA datasets. The  
188 CCF dataset consisted of JAX, Allegro, and mWGS data (Fig. 3f). Similar patterns to the HLB data  
189 were seen, except that more MAGs were observed in the mWGS data than the MA-GenTA  
190 MAGs at a 0.01% threshold. Most CCF samples that had more MA-GenTA reads than mWGS  
191 reads; when the reference database was extended to include lower completeness MAGs, fewer  
192 hqMAGs were observed using mWGS reads, suggesting that non-specific mapping could explain  
193 some of the discrepancy (Supplementary Fig.5). In the VNDR dataset, only 16S rRNA data was  
194 available for comparison. For these samples, more MAGs were detected by the MA-GenTA than  
195 16S OTUs at lower abundances (Fig. 3g).

196 In order to demonstrate the utility of the MA-GenTA assay in characterizing microbial  
197 profiles in an experimental context, we used the MA-GenTA datasets for analysis of the HLB  
198 samples. Prior results identified OTU differences between C57BL/6J mice and HLB444 mice,  
199 which carry a mutation in the *Klf15* gene, on both a standard chow diet and after introduction  
200 of a high-fat, high-sugar diet (HF)<sup>21</sup>. HLB444 mice are resistant to diet-induced obesity when fed  
201 the HF diet. To determine the ability of the MA-GenTA assay to differentiate these groups, the  
202 Bray-Curtis dissimilarity metric was applied to the 16S, mWGS, and MA-GenTA data of the same  
203 samples and viewed with non-metric multi-dimensional scaling (NMDS) plots (Fig. 4a). All assays  
204 showed samples clustered by diet (Chow vs. HF) and mouse strain (C57BL/6J vs. HLB444).  
205 PERMANOVA analysis for each of the sequencing assays confirmed significant clustering  
206 between mouse strain and diet: Allegro assay ( $f = 2.6961$ ,  $p = 0.0029$ ), JAX assay ( $f = 13.629$ ,  $p =$   
207  $0.0009$ ), 16S ( $f = 19.581$ ,  $p = 0.0009$ ), mWGS ( $f = 2.05$ ,  $p = 0.0099$ ) (Supplementary Table 3).  
208



209 *Functional analysis using MA-GenTA*

210           Given the relative abundance of MAGs in each sample, we inferred the functional  
211 potential of each sample based on links of proteins encoded in each MAG to KEGG pathways.  
212 MA-GenTA read counts for each MAG in the HLB samples were assigned to KEGG pathways on a  
213 per-sample basis and then converted to relative abundance. Linear discriminant analysis in  
214 LEfSe was used to determine differentially abundant pathways between the two mouse strains  
215 and the two diets. The number of differentially abundant pathways varied across comparisons  
216 (HLB444 vs. B6 on HF diet (53,60), HLB444 vs. B6 on Chow (66,63), Chow vs. HF in HLB444  
217 (101,103), and Chow vs. HF in B6 (75,81)) for the Allegro and JAX datasets respectively  
218 (Supplementary Table 4). Inter-assay KEGG pathway concordance was 82% for HLB444 vs. B6 on  
219 HF, 72% for HLB444 vs. B6 on Chow, 96% for Chow vs. HF in HLB444, and 77% for Chow vs. HF  
220 in B6. Consideration of the response of HLB444 and B6 strains to the HF diet showed  
221 differences in carbohydrate metabolism between the two strains on the HF diet, with HLB444  
222 animals having higher representation of glycolysis, TCA cycle, and oxidative phosphorylation,  
223 and B6 animals with higher representation of pathways related to utilization of other sugars  
224 (Fig. 4b, Supplementary Figs. 6-13). These and other differences distinguished the response to  
225 HF diet of these two mouse strains and suggest microbial differences contribute to the ability of  
226 HLB mice to adapt to the HF diet.

227

228 *Specificity of MA-GenTA in a complex microbial environment*

229           As an additional way to assess the specificity of probe targeting, both probe sets were  
230 used to assay metagenomic DNA extracted from a human stool specimen, which serves as a  
231 highly complex microbial sample with few organisms in common with mouse fecal bacteria  
232 (Supplementary Fig. 14). While there are deep-branching similarities in the gut microbiota of  
233 human and mouse, there are major differences at the genus and species level<sup>11,22,23</sup>. There  
234 were sixteen MAGs detected in the human stool sample using the same thresholds for  
235 detection as used for the mouse samples (minimum of 10 probes per MAG at  $\geq 0.001\%$  probe  
236 abundance). The taxa associated with the detected MAGs have previously been found in human  
237 stool samples<sup>24-30</sup>.

238

## 239 Discussion

240 As the field of microbial community profiling grows, the need for informative, cost-  
241 effective, and streamlined assays of microbial composition becomes more important. Although  
242 initially developed for genotyping applications, we have shown that by combining results from  
243 multiple rigorously selected probes per genome, the Allegro Targeted Genotyping Assay can  
244 produce accurate microbial relative abundance data across at least three orders of magnitude  
245 dynamic range at a cost that is only moderately higher than 16S rRNA profiling. MA-GenTA  
246 bridges the gap between 16S rRNA gene sequencing and mWGS, combining some of the  
247 strengths of each approach (Table 2).

248 A hallmark and major motivation of mWGS sequencing is the ability to analyze  
249 functional capability of the organisms in an environment. Strategies have been described to  
250 predict function based on OTU composition<sup>31-33</sup>, but they are strongly dependent on the  
251 reference databases and perform poorly on datasets from non-human-associated microbes<sup>34</sup>.  
252 Because probe design for the MA-GenTA assay requires reference genomes, this approach does  
253 not contribute to bacterial discovery. However, gene and pathway abundance data can be  
254 inferred from MA-GenTA data by pairing read counts to pathways represented in the reference  
255 genomes more directly than based on 16S rRNA sequences.

256 Capture-based targeted sequencing methods have been widely used for exome  
257 sequencing and cancer mutation profiling<sup>17,18,35</sup>, and represent a potential alternative approach  
258 for microbiome profiling. Guitor, *et al.* recently described a method for highly multiplexed  
259 detection of antibiotic resistance genes and bacteria that relies on biotinylated capture  
260 probes<sup>36,37</sup>. These probes and streptavidin bead capture kits are costly and require each  
261 specimen to be processed separately, making library preparation laborious. By contrast, the  
262 Allegro workflow involves pooling after a sample-specific tagging step and combination of pools  
263 can yield up to 3072 uniquely barcoded libraries on a single sequencing run. Up to 100k probes  
264 can be included in a single Allegro design. Unlike array-based platforms<sup>38</sup>, it is straightforward  
265 to alter the design of the MA-GenTA probe pool with each reagent order, allowing both the

266 refinement of the selected probes for each genome and the inclusion of additional content over  
267 time.

268 The ability to synthesize probes based on user-defined parameters allows for broad or  
269 targeted study of microbial communities, specific species or strains, genes of interest, antibiotic  
270 resistance or virulence markers. Probe designs that focus on universal genes may be a good  
271 choice for species tagging, while probes targeting variable regions could provide additional  
272 information on pangenome variation. An important factor to consider when designing a probe  
273 pool for MA-GenTA is the reference database from which probes are chosen, including how  
274 representative the database is of organisms present in the sample. Across mouse mWGS  
275 samples, only about 60% of reads matched the iMGMC hqMAGs, reinforcing the need for a  
276 more robust reference for the mouse stool microbial community. Further optimization of the  
277 MA-GenTA assay might involve adjusting the number of probes per genome and how  
278 thresholds for probe abundance and probe representation are used to reduce noise and  
279 increase confidence of MAG assignment. Although not examined here, the specificity of the  
280 MA-GenTA assay would also be advantageous in specimens with high proportions of host  
281 genomic DNA where mWGS analysis is inefficient. The MA-GenTA assay could also be adapted  
282 to an RNAseq format for quantitative gene expression analysis.

283

## 284 **Methods**

### 285 **Probe design and filtering**

286 The “high quality” MAG set from the integrated Mouse Gut Metagenomic Catalog  
287 (iMGMC) was accessed from GitHub (<https://github.com/tillrobin/iMGMC>). The hqMAG set  
288 comprised 830 dereplicated genome equivalents predicted to be >90% complete and <5%  
289 contaminated based on analysis by CheckM<sup>16</sup>. Two probe design strategies were used. For the  
290 JAX design, the probe selection program CATCH<sup>39</sup> was run on each hqMAG separately to design  
291 over 50,000 40-base probes per MAG. BLAST was used to match probes to Prokka-annotated  
292 ORFs<sup>40</sup>. Probes with BLAST matches shorter than 40 bp in length or less than 100% identity  
293 were removed, followed by probes corresponding to genome regions on a pre-defined discard  
294 list. Discard regions included annotations listed as tRNAs, ribosomal proteins, and with encoded

295 proteins with the term “repeat” or “hypothetical” in the name. Probes were required to have  
296 between 45 and 65% G+C nucleotides. Probes with multiple matches within the hqMAG or to  
297 more than one hqMAG were also excluded. Probes matching the single-copy MUSiCC gene list<sup>41</sup>  
298 were flagged for probe selection. All resulting probes were sent to Tecan Genomics (Redwood  
299 City, CA) where probe compatibility was assessed for probe pool production based on the  
300 Allegro Targeted Genotyping protocol, and probe pools with 20 probes per MAG were  
301 synthesized (JAX design), with 10 representing MUSiCC genes and 10 representing non-MUSiCC  
302 genes. The iMGMC hqMAGs were also used by Tecan Genomics to create a second probe pool  
303 (Allegro design) with 20 probes per MAG. There were 16 MAGs that did not pass probe-  
304 synthesis filtering metrics for the JAX design but were present in the Allegro design. The final  
305 probe pools contained 16,600 probes for the Allegro design and 16,280 probes for the JAX  
306 design. Cross-reference between the hqMAG set and the ZymoBIOMICS Microbial Community  
307 Standard was determined using BLAST alignment<sup>42</sup>, resulting in 3 MAGs matching genomes  
308 from the ZymoBIOMICS genomes (*Escherichia coli*, *Enterococcus faecalis*, and *Pseudomonas*  
309 *aeruginosa*).

310

### 311 **DNA Extraction of Mouse Stool Pellets and Controls**

312 Genomic DNA isolated from mouse stool pellets from several studies was used for  
313 evaluation of the MA-GenTA assay (Table 2). All procedures used for animal husbandry and  
314 collection of specimens were approved by the Jackson Laboratory Animal Care and Use  
315 Committee and research was conducted in conformity with the *Public Health Service Policy on*  
316 *Humane Care and Use of Laboratory Animals*. The HLB and VNDR study pellets and positive  
317 controls (*E. coli*, ZymoBIOMICS Mock) were lysed using Qiagen PowerBead garnet tubes with 1  
318 mL Qiagen InhibitEX buffer. The lysate was then processed with the QiaCube HT instrument  
319 using a modified Qiagen QIAamp 96 DNA QIAcube HT protocol<sup>21</sup> (Svenson). Each sample (a  
320 single stool pellet, 10-60 mg total weight) was added to a Qiagen PowerBead 0.7 mm garnet  
321 tube with 1 mL of QIAGEN InhibitEX buffer. All samples were incubated at 65°C for 10 minutes  
322 followed by 95°C for 10 minutes. The samples were then mechanically lysed for 2 cycles of 30  
323 seconds at 3,700 RPM on a QIAGEN Powerlyzer 24 Homogenizer, with a 1-minute rest period

324 between cycles. Samples were then centrifuged at 10,000 x g for 1 minute, and then 200  $\mu$ L of  
325 this lysate was then mixed with AL Buffer (285  $\mu$ L) and Proteinase K (5  $\mu$ L). The lysate was  
326 incubated for 10 minutes at 70°C and followed by an ice incubation for 5 minutes. 485  $\mu$ L of  
327 lysate was transferred to a QiaCube HT instrument, where the lysate was combined with 200  $\mu$ L  
328 of 100% Ethanol and then bound to the Qiaamp 96 plate. Each well of the Qiaamp 96 plate was  
329 then washed with 600  $\mu$ L of AW1 Buffer, AW2 Buffer, and then 100% Ethanol. DNA was then  
330 eluted with 100  $\mu$ L of AE Buffer without using TopElute fluid. The CCF stool pellets were  
331 homogenized with 500  $\mu$ L Tissue and cell lysis buffer (Lucigen<sup>®</sup>) by pipetting up and down. An  
332 aliquot of 100  $\mu$ L was removed and treated with an enzyme cocktail (5  $\mu$ L 10 mg/mL lysozyme,  
333 1  $\mu$ L lysostaphin (5000 U/mL), 1  $\mu$ L mutanolysin (5000 U/mL) and 20  $\mu$ L Tissue and cell lysis  
334 buffer) for 30 minutes at 37°C. Buffer ASL (QIAGEN<sup>®</sup>) (200  $\mu$ L with 0.5  $\mu$ L anti-foaming agent  
335 DX) was added to each tube and mixed. Samples were placed on a QIAGEN<sup>®</sup> TissueLyser II bead  
336 beater for 2x 3 minutes (30 Hz) and then spun down in a microcentrifuge. Each sample (200  $\mu$ L)  
337 was further processed on the QIAGEN QIAamp 96 DNA QIAcube HT protocol.

338

### 339 **Allegro Targeted Genotyping Sample Prep and Sequencing**

340 The Allegro Targeted Genotyping V2 protocol (publication number M01501, Tecan  
341 Genomics, Inc.) was followed for library preparation of all samples in duplicate with the Allegro  
342 and JAX probe pools. Briefly, gDNA samples were enzymatically fragmented, followed by  
343 ligation of barcoded adaptors. Barcoded samples were then purified and pooled together in  
344 groups of 48. Each pool of 48 samples was placed in an overnight annealing and extension  
345 reaction with the probe pool, followed by an AMPure XP bead purification. A qPCR step was  
346 used to determine the number of cycles used in the library amplification (18 cycles). Amplified  
347 libraries were bead purified (AMPure XP) and pooled in equimolar ratios for sequencing. A no  
348 template control (NTC), *Escherichia coli* gDNA (ATCC<sup>®</sup> 8739™), a human stool metagenome DNA  
349 sample<sup>43</sup> (Petersen et al), and a defined composition microbial community control  
350 (ZymoBIOMICS Microbial Community Standard, Cat # D6300) were used as controls. Libraries  
351 created from the Allegro Targeted Genotyping Assay were pooled and sequenced on an  
352 Illumina NovaSeq SP 2x150bp run, using the custom R1 primer and 1% spike-in of phiX174

353 library as recommended. Libraries were loaded on the NovaSeq SP at 60% of standard loading  
354 per Allegro Targeted Genotyping Assay recommendation; only forward read data was used for  
355 analysis.

356

## 357 **Data analysis**

### 358 *mWGS read mapping and 16S OTU generation*

359 The raw mWGS sequences were trimmed of adapters and low-quality bases using  
360 Cutadapt version 1.14<sup>44</sup>. Host contaminant sequences were identified and filtered out using  
361 Kraken2 version 2.0.8-beta<sup>45</sup>. The clean sequences were aligned against the reference (iMGMC  
362 MAGs) using BWA version 0.7.12<sup>46</sup> with parameter settings: `bwa mem -M -P`. The non-primary  
363 alignment reads were then filtered out using SAMtools version 0.1.19<sup>47</sup> with parameter setting:  
364 `-F 256`. Reads were filtered using 97.5% ID and 50% coverage thresholds. Finally, the read count  
365 table by bin for each sample was generated from the alignment file. On average, about 60% of  
366 total mWGS reads mapped to the iMGMC 830 hqMAGs. 16S OTUs were generated for the HLB  
367 and VNDR data with USEARCH, using previously published parameters<sup>21,48</sup>.

368

### 369 *MA-GenTA read mapping and data analysis*

370 Raw sequences were trimmed using TrimGalore/CutAdapt to remove the 40 bp probe  
371 (<https://github.com/FelixKrueger/TrimGalore>)<sup>44</sup>. Read mapping to hqMAGs was performed  
372 using BWA. Sequences of up to 110 bp downstream of the probes were mapped to the iMGMC  
373 reference index. Reads mapped with <95.5% identity and  $\leq 50\%$  query length were removed.  
374 Secondary alignments with lower alignment scores were removed and then reads mapped to  
375 multiple sites with similar alignment scores were removed, which resulted in uniquely mapped  
376 reads. BEDtools intersect command was used to match read alignment locations to the genome  
377 locations of the designed probes to provide “on-target” read counts, removing reads that  
378 aligned to regions outside of the expected probe annealing location<sup>49</sup>. Counts tables were  
379 created representing the on-target read count and relative abundance of each probe in each  
380 hqMAG and the summed read counts and relative abundance for all probes per hqMAG. All  
381 analyses were performed in R (version 4.0.2)<sup>50</sup>. Allegro and JAX designs were compared based

382 on the relative abundance per MAG and the number of probes per MAG matched in each  
383 sample. A Pearson correlation was performed on the MAG abundance comparison between the  
384 two designs and between each design and the relative abundance based on mWGS sequencing.  
385 The JAX and Allegro data were compared to 16S and mWGS data for the same samples on the  
386 basis of alpha (observed) and beta diversity (Bray-Curtis dissimilarity) metrics using Phyloseq<sup>51</sup>.

### 387 388 *Functional analysis*

389 Protein coding sequences in the hqMAGs were predicted using Prodigal<sup>52</sup>, implemented  
390 in Prokka<sup>40</sup>. Functional annotation of the predicted CDS regions was performed using EggNOG-  
391 Mapper<sup>53</sup>, using Diamond<sup>54</sup> for searches, and with overlap parameters requiring at least 25%  
392 query and reference coverage. For each sample, the number of reads mapping to each MAG  
393 was assigned to each KEGG pathway<sup>55</sup> for all constituent CDS regions. Differences in pathway  
394 abundance among sample groups was determined using linear discriminant analysis effect size  
395 with LEfSe<sup>56</sup>.

### 396 397 *Data Availability*

398 Sequence data created in this study have been deposited in GenBank with the  
399 BioProject accession PRJNA646241. The probe sequences used for this study have been  
400 deposited to GitHub: <https://github.com/TheJacksonLaboratory/MA-GenTA>.

### 401 *Code Availability*

402 All code used for probe design and data analysis, along with read count tables have  
403 been deposited to GitHub: <https://github.com/TheJacksonLaboratory/MA-GenTA>.

404  
405 **Acknowledgements:** We gratefully acknowledge the contribution of the Microbial Genomics  
406 Service and Genome Technologies Service at The Jackson Laboratory for expert assistance  
407 with the work described in this publication. We also gratefully acknowledge the Bioinformatics  
408 team at Tecan Genomics for their assistance in probe pool design and analysis development.  
409 We thank Julia Oh and John Graham for pre-publication access to mWGS data from stool  
410 specimens of collaborative cross founder (CCF) mouse strains.

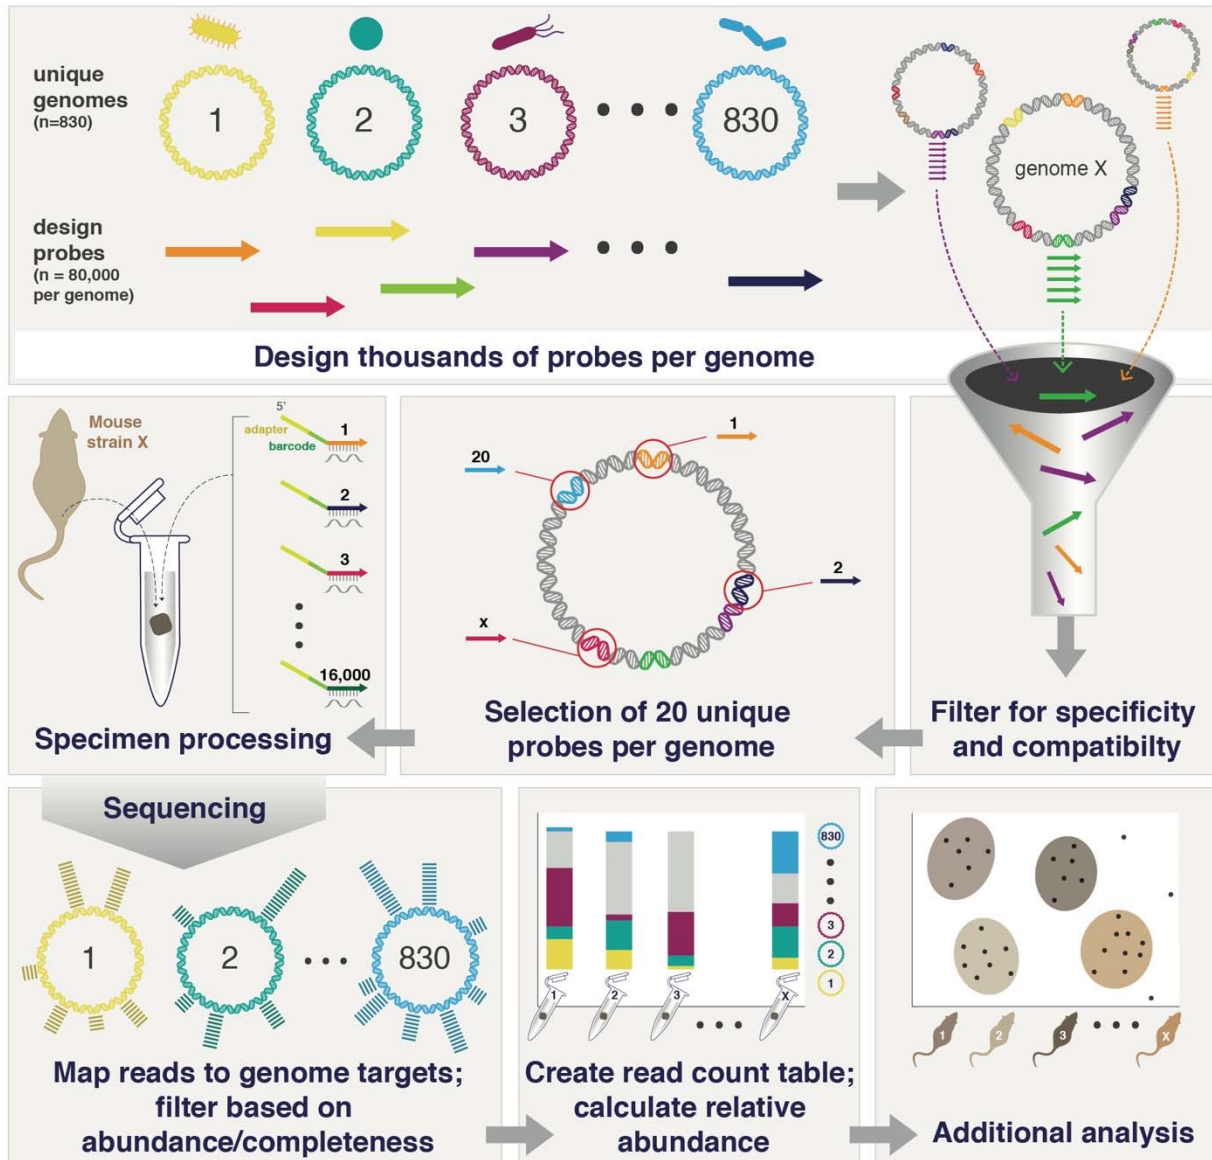

411

412 **Figure 1. Overview of the MA-GenTA strategy.** MA-GenTA utilizes software (CATCH) to design  
413 thousands of probes per genome for multiple genomes (830 in this study). All probes from the  
414 initial design are filtered based on multiple parameters (%GC, BLAST matches to  
415 inclusion/exclusion lists, non-unique matches across genomes, etc). Unique probes are selected  
416 for each genome (20 in this study). Probe pools are synthesized and used to prepare  
417 sequencing libraries using the Allegro Targeted Genotyping kit, and then sequenced. Reads are  
418 then mapped to the reference genomes to produce count tables for downstream analysis.

419

420



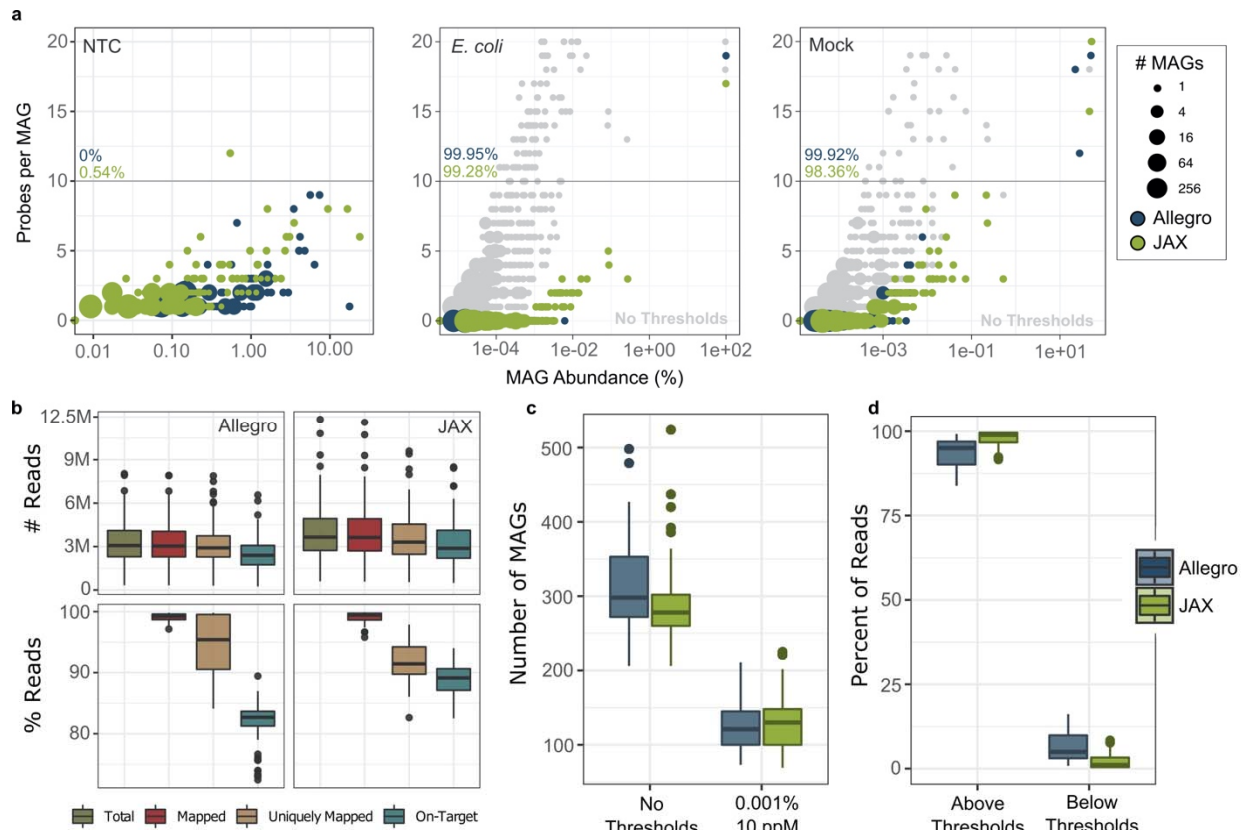

421

422 **Figure 2. Use of control samples to establish thresholds for defining MAG presence.**

423 Thresholds for declaring a MAG present in a sample were determined using a no template  
 424 control (NTC), *Escherichia coli* genomic DNA, and ZymoBIOMICS Microbial Community  
 425 Standard. **a**, The number of probes present for each MAG (y-axis) and the MAG abundance (x-  
 426 axis) for each control sample before applied thresholds is shown in gray. Blue (Allegro) and  
 427 green (JAX) points indicate MAGs detected in each control sample after a 0.001% minimum  
 428 probe-abundance threshold was applied. **b**, Sequencing reads from the Allegro and JAX probe  
 429 pools were mapped to the iMGMC hqMAGs. **Top**: Read counts per sample for total reads,  
 430 aligned reads, uniquely mapped reads, and uniquely-mapped, on-target reads. **Bottom**: Same  
 431 data as in the top panel, but expressed as percent of total reads. **c**, The number of MAGs  
 432 detected with minimum probe abundance and probe representation (probes per MAG-ppM)  
 433 thresholds is shown compared to the number of MAGs detected with no thresholds across  
 434 mouse samples. **d**, Most reads correspond to probes that pass the probe-representation  
 435 thresholds.

436

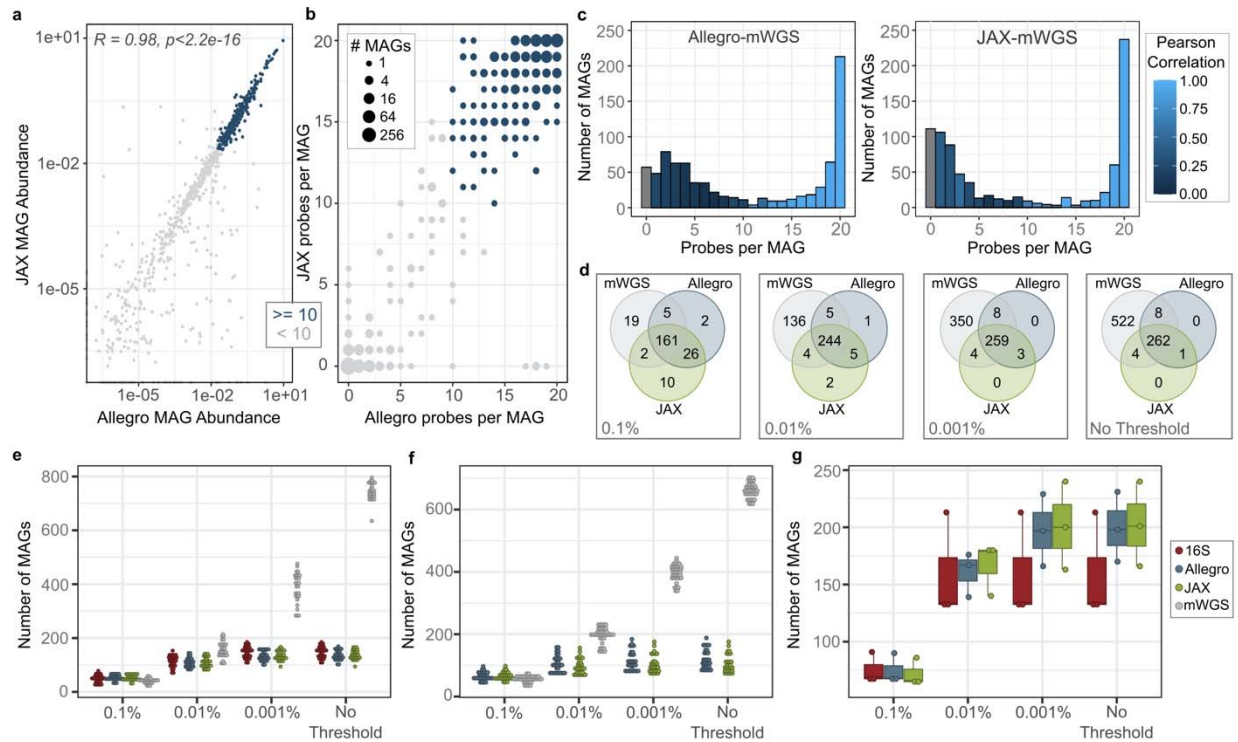

437

438 **Figure 3. Comparison of MA-GentA probe pools to established sequencing assays. a,** The  
 439 percent relative abundance of each MAG in each sample based on the Allegro design (x-axis)  
 440 and the JAX design (y-axis) is shown. MAGs with 10 or more probes above the 0.001% probe-  
 441 abundance threshold in both designs are shown in blue. Pearson correlation of the two designs  
 442 is  $R = 0.98$ . **b,** The number of probes per MAG detected using the Allegro design (x-axis) and JAX  
 443 design (y-axis) As in C, MAGs with at least 10 probes with  $\geq 0.001\%$  abundance in both assays  
 444 are colored blue. Most MAGs have  $\geq 15$  probes per MAG above the threshold (top right) or  $\leq 5$   
 445 (bottom left). **c,** The relative abundance of each MAG as inferred from the targeted and mWGS  
 446 data was compared across the mouse stool samples using histograms showing the number of  
 447 MAGs (y-axis) with the number of probes observed per MAG (x-axis) with no minimum probe-  
 448 abundance threshold. The color-scale shows the Pearson correlation of the relative abundance  
 449 between the Allegro (left) JAX (right) data and the mWGS data. **d,** The total number of MAGs  
 450 present in each assay (JAX, Allegro, mWGS) are shown in Venn-diagrams, highlighting the  
 451 overlapping MAGs between the assays. **e,** Samples from the HLB dataset are shown with 16S  
 452 rRNA v1-v3 OTUs, and hqMAGs detected by Allegro, JAX, and mWGS assays at a range of  
 453 minimum probe-abundance thresholds. **f,** CCF samples with hqMAGs detected by Allegro, JAX,

454 and mWGS assays. **g**, VNDR samples with 16S rRNA v1-v3 OTUs, and hqMAGs detected by  
 455 Allegro and JAX assays.  
 456

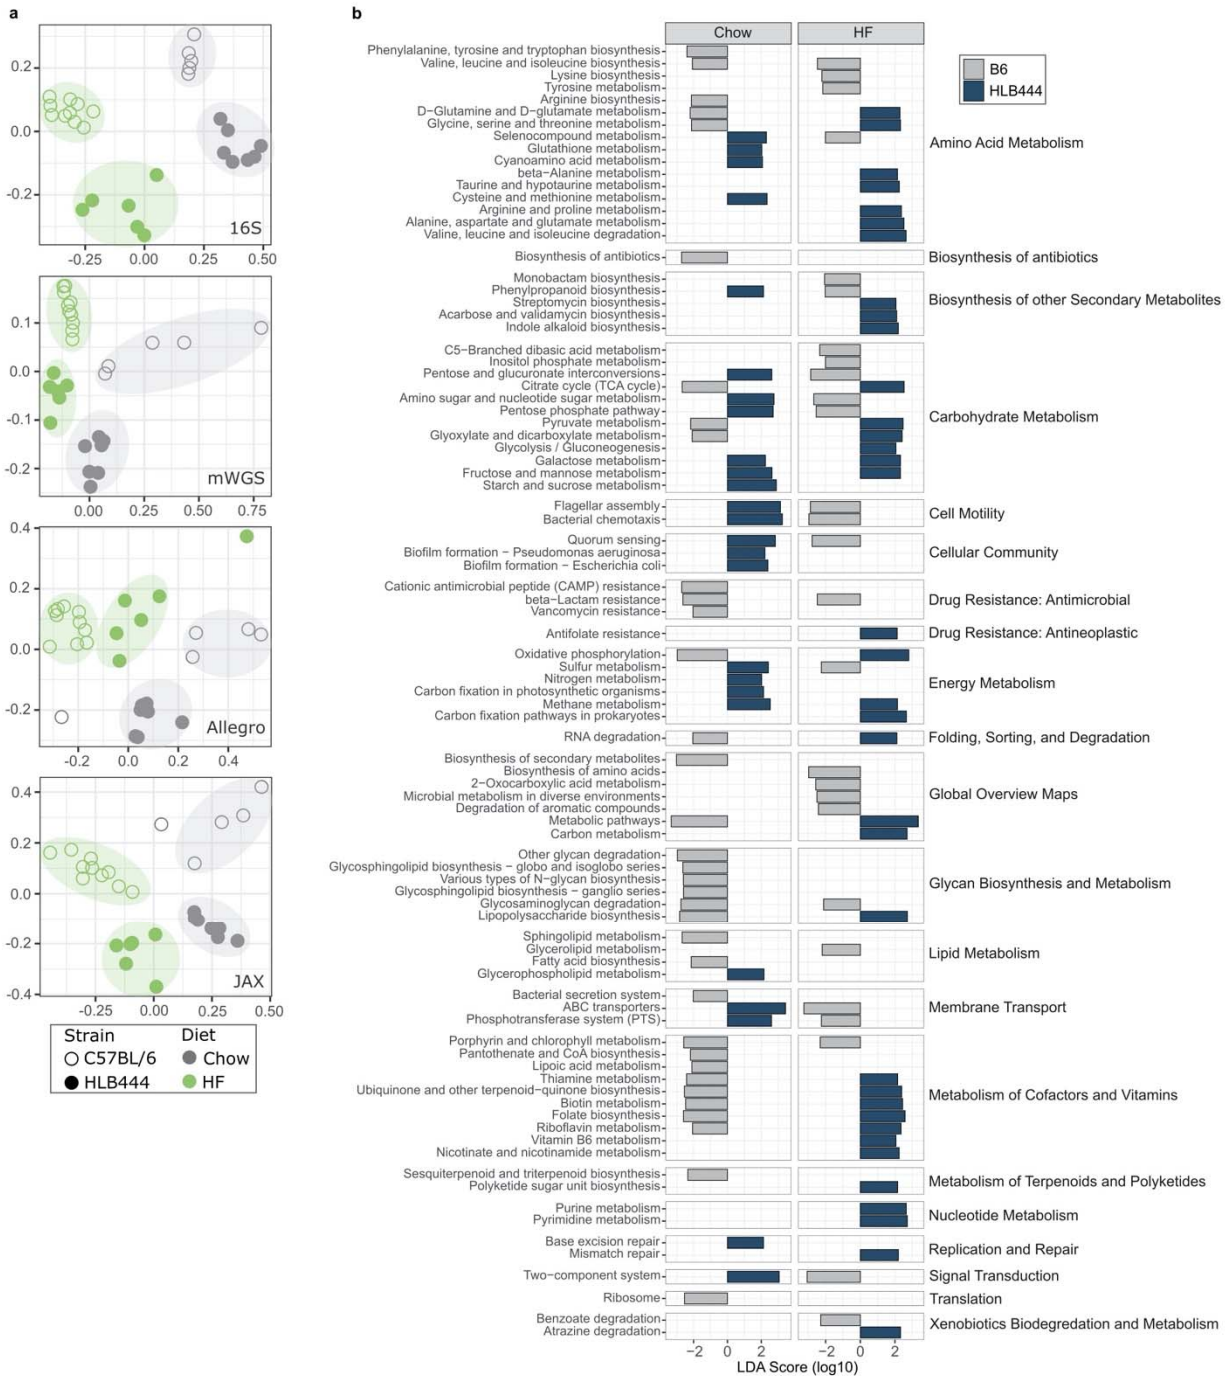

457  
 458 **Figure 4. MA-GenTA as an assay for experimental group differentiation and functional**  
 459 **analysis. a**, The Bray-Curtis dissimilarity metric was applied to HLB data from each sequencing

460 assay and shown in non-metric multi-dimensional scaling (NMDS) plots. Points are colored by  
461 diet, closed circles represent HLB444 samples, and open circles are C57BL/6J samples. All four  
462 sequencing assays cluster points based on diet and mouse strain. **b**, LDA analysis of KO  
463 pathways inferred by MA-GenTA MAG abundances shows differentially abundant pathways  
464 between HLB444 and B6 mouse strains on chow and HF diets.

465

466

467

468

469

470

471

472

473

474

475

476

477

478

479

480

481

482

483

484

485

486

487

488

489 Table 1. Mouse specimen groups used for analysis.

| Study code | Summary                                            | N samples | Data Type | Reference                                        | BioProject Accession |
|------------|----------------------------------------------------|-----------|-----------|--------------------------------------------------|----------------------|
| HLB        | C57BL/6J and HLB444 mice on chow and high-fat diet | 29        | 16S       | Svenson <i>et al.</i> <sup>21</sup>              | PRJNA505515          |
|            |                                                    |           | mWGS      | Unpublished                                      | PRJNA646227          |
| VNDR       | C57BL/6J and C57BL/6N mice from three vendors      | 3         | 16S       | Long, <i>et al.</i> , submitted for publication) | PRJNA622479          |
| CCF        | C57BL/6J, CAST, and PWK mice                       | 40        | mWGS      | Oh, <i>et al.</i> , unpublished)                 | PRJNA646095          |

490

491

492 Table2. Comparison of microbial community profiling assays.

| Feature                     | 16S rRNA gene sequencing                                                                                                                   | Whole metagenome sequencing                                                                                                                              | MA-GenTA                                                                                                                                                                                                              |
|-----------------------------|--------------------------------------------------------------------------------------------------------------------------------------------|----------------------------------------------------------------------------------------------------------------------------------------------------------|-----------------------------------------------------------------------------------------------------------------------------------------------------------------------------------------------------------------------|
| <b>Taxonomic Resolution</b> | ~Family/genus level for 16S rRNA subregions; strain level for full-length gene                                                             | Species/strain level                                                                                                                                     | Species/strain level                                                                                                                                                                                                  |
| <b>Gene content</b>         | None                                                                                                                                       | High                                                                                                                                                     | Inferred based on genome matches                                                                                                                                                                                      |
| <b>Analysis complexity</b>  | Medium                                                                                                                                     | High                                                                                                                                                     | Medium                                                                                                                                                                                                                |
| <b>Cost</b>                 | <\$50/sample                                                                                                                               | >\$100/sample                                                                                                                                            | \$50-\$75/sample                                                                                                                                                                                                      |
| <b>Pros</b>                 | <ul style="list-style-type: none"> <li>• Quick community survey</li> <li>• Large number of studies from many environments/hosts</li> </ul> | <ul style="list-style-type: none"> <li>• New organism/gene discovery</li> <li>• Direct comparison of datasets with same reference for mapping</li> </ul> | <ul style="list-style-type: none"> <li>• Efficient pooled-sample workflow</li> <li>• Customized target selection/pool composition</li> <li>• Direct comparison of datasets with same reference for mapping</li> </ul> |
| <b>Cons</b>                 | <ul style="list-style-type: none"> <li>• Limited taxonomic specificity</li> <li>• No gene content information</li> </ul>                   | <ul style="list-style-type: none"> <li>• Possible mis-assignment of reads to closely related organisms</li> <li>• Cost</li> </ul>                        | <ul style="list-style-type: none"> <li>• Limited to existing organisms/genomes</li> <li>• Limited pan-genome characterization</li> </ul>                                                                              |

493

494

495

496 References:

- 497 1. Poretsky, R., Rodriguez-R, L. M., Luo, C., Tsementzi, D. & Konstantinidis, K. T. Strengths and  
498 Limitations of 16S rRNA Gene Amplicon Sequencing in Revealing Temporal Microbial  
499 Community Dynamics. *PLoS ONE* **9**, e93827 (2014).
- 500 2. Shin, J. *et al.* Analysis of the mouse gut microbiome using full-length 16S rRNA amplicon  
501 sequencing. *Sci. Rep.* **6**, 29681 (2016).
- 502 3. Shoreline Biome. *Shoreline Biome* <https://www.shorelinebiome.com>.
- 503 4. Yang, B., Wang, Y. & Qian, P.-Y. Sensitivity and correlation of hypervariable regions in 16S  
504 rRNA genes in phylogenetic analysis. *BMC Bioinformatics* **17**, 135 (2016).
- 505 5. Guo, F., Ju, F., Cai, L. & Zhang, T. Taxonomic Precision of Different Hypervariable Regions of  
506 16S rRNA Gene and Annotation Methods for Functional Bacterial Groups in Biological  
507 Wastewater Treatment. *PLOS ONE* **8**, e76185 (2013).
- 508 6. Johnson, J. S. *et al.* Evaluation of 16S rRNA gene sequencing for species and strain-level  
509 microbiome analysis. *Nat. Commun.* **10**, 5029 (2019).
- 510 7. Ranjan, R., Rani, A., Metwally, A., McGee, H. S. & Perkins, D. L. Analysis of the microbiome:  
511 Advantages if whole genome shotgun versus 16S amplicon sequencing. *Biochem. Biophys.*  
512 *Res. Commun.* **469**, 967–977 (2016).
- 513 8. The Human Microbiome Project Consortium. A framework for human microbiome research.  
514 *Nature* **486**, 215–221 (2012).
- 515 9. Ehrlich, S. D. MetaHIT: The European Union Project on Metagenomics of the Human  
516 Intestinal Tract. *Metagenomics Hum. Body* 307–316 (2011).
- 517 10. Hugenholtz, F. & de Vos, W. M. Mouse models for human intestinal microbiota research: a  
518 critical evaluation. *Cell. Mol. Life Sci.* **75**, 149–160 (2018).

- 519 11. Xiao, L. *et al.* A catalog of the mouse gut metagenome. *Nat. Biotechnol.* **33**, 1103–1108  
520 (2015).
- 521 12. Parks, D. H. *et al.* Recovery of nearly 8,000 metagenome-assembled genomes substantially  
522 expands the tree of life. *Nat. Microbiol.* **2**, 1533–1542 (2017).
- 523 13. Alneberg, J. *et al.* Genomes from uncultivated prokaryotes: a comparison of metagenome-  
524 assembled and single-amplified genomes. *Microbiome* **6**, 173 (2018).
- 525 14. Almeida, A. *et al.* A unified catalog of 204,938 reference genomes from the human gut  
526 microbiome. *Nat. Biotechnol.* 1–10 (2020).
- 527 15. Lesker, T. R. *et al.* An Integrated Metagenome Catalog Reveals New Insights into the Murine  
528 Gut Microbiome. *Cell Rep.* **30**, 2909–2922.e6 (2020).
- 529 16. Parks, D. H., Imelfort, M., Skennerton, C. T., Hugenholtz, P. & Tyson, G. W. CheckM:  
530 assessing the quality of microbial genomes recovered from isolates, single cells, and  
531 metagenomes. *Genome Res.* **25**, 1043–1055 (2015).
- 532 17. Scaglione, D. *et al.* Single primer enrichment technology as a tool for massive genotyping: a  
533 benchmark on black poplar and maize. *Ann. Bot.* **124**, 543–551 (2019).
- 534 18. Barchi, L. *et al.* Single Primer Enrichment Technology (SPET) for High-Throughput  
535 Genotyping in Tomato and Eggplant Germplasm. *Front. Plant Sci.* **10**, (2019).
- 536 19. Bonde, M. T. *et al.* Direct Mutagenesis of Thousands of Genomic Targets Using Microarray-  
537 Derived Oligonucleotides. *ACS Synth. Biol.* **4**, 17–22 (2015).
- 538 20. Hiatt, J. B., Pritchard, C. C., Salipante, S. J., O’Roak, B. J. & Shendure, J. Single molecule  
539 molecular inversion probes for targeted, high-accuracy detection of low-frequency  
540 variation. *Genome Res.* **23**, 843–854 (2013).

- 541 21. Svenson, K. L., Long, L. L., Ciciotte, S. L. & Adams, M. D. A mutation in mouse Krüppel-like  
542 factor 15 alters the gut microbiome and response to obesogenic diet. *PLoS ONE* **14**, (2019).
- 543 22. Ley, R. E. *et al.* Obesity alters gut microbial ecology. *Proc. Natl. Acad. Sci.* **102**, 11070–11075  
544 (2005).
- 545 23. Nguyen, T. L. A., Vieira-Silva, S., Liston, A. & Raes, J. How informative is the mouse for  
546 human gut microbiota research? *Dis. Model. Mech.* **8**, 1–16 (2015).
- 547 24. Martínez, I., Muller, C. E. & Walter, J. Long-Term Temporal Analysis of the Human Fecal  
548 Microbiota Revealed a Stable Core of Dominant Bacterial Species. *PLoS ONE* **8**, e69621  
549 (2013).
- 550 25. Ormerod, K. L. *et al.* Genomic characterization of the uncultured Bacteroidales family S24-7  
551 inhabiting the guts of homeothermic animals. *Microbiome* **4**, 36 (2016).
- 552 26. Johnson, J. L., Moore, W. E. C. & Moore, L. V. H. *Bacteroides caccae* sp. nov., *Bacteroides*  
553 *merdae* sp. nov., and *Bacteroides stercoris* sp. nov. Isolated from Human Feces. *Int. J. Syst.*  
554 *Bacteriol.* **36**, 499–501 (1986).
- 555 27. ricaboni, D., Mailhe, M., Khelaifa, S., Raoult, D. & Million, M. *Romboutsia timonensis*, a new  
556 species isolated from human gut. *New Microbes New Infect.* **12**, 6–7 (2016).
- 557 28. Tytgat, H. L. P. *et al.* Complete Genome Sequence of *Enterococcus faecium* Commensal  
558 Isolate E1002. *Genome Announc.* **4**, (2016).
- 559 29. Feng, Z. *et al.* A human stool-derived *Bilophila wadsworthia* strain caused systemic  
560 inflammation in specific-pathogen-free mice. *Gut Pathog.* **9**, 59 (2017).
- 561 30. Song, Y. *et al.* '*Bacteroides goldsteinii* sp. nov.' Isolated from Clinical Specimens of Human  
562 Intestinal Origin. *J. Clin. Microbiol.* **43**, 4522–4527 (2005).



- 563 31. Langille, M. G. I. *et al.* Predictive functional profiling of microbial communities using 16S  
564 rRNA marker gene sequences. *Nat. Biotechnol.* **31**, 814–821 (2013).
- 565 32. Aßhauer, K. P., Wemheuer, B., Daniel, R. & Meinicke, P. Tax4Fun: predicting functional  
566 profiles from metagenomic 16S rRNA data. *Bioinformatics* **17**, 2882–2884 (2015).
- 567 33. Ward, T. *et al.* BugBase predicts organism-level microbiome phenotypes. *BioRxiv* (2017).
- 568 34. Sun, S., Jones, R. B. & Fodor, A. A. Inference-based accuracy of metagenome prediction  
569 tools varies across sample types and functional categories. *Microbiome* **8**, 46 (2020).
- 570 35. Lonigro, R. J. *et al.* Detection of somatic copy number alterations in cancer using targeted  
571 exome capture sequencing. *Neoplasia* **13**, 019–1025 (2011).
- 572 36. Guitor, A. K. *et al.* Capturing the Resistome: A Targeted Capture Method To Reveal  
573 Antibiotic Resistance Determinants in Metagenomes. *Antimicrob. Agents Chemother.* **64**,  
574 (2020).
- 575 37. Allicock, O. M. *et al.* BacCapSeq: a Platform for Diagnosis and Characterization of Bacterial  
576 Infections. *mBio* **9**, (2018).
- 577 38. Heller, M. J. DNA Microarray Technology: Devices, Systems, and Applications. *Annu. Rev.*  
578 *Biomed. Eng.* **4**, 129–153 (2002).
- 579 39. Metsky, H. C. *et al.* Capturing sequence diversity in metagenomes with comprehensive and  
580 scalable probe design. *Nat. Biotechnol.* **37**, 160–168 (2019).
- 581 40. Seemann, T. Prokka: rapid prokaryotic genome annotation. *Bioinformatics* **30**, 2068–2069  
582 (2014).

- 583 41. Manor, O. & Borenstein, E. MUSiCC: a marker genes based framework for metagenomic  
584 normalization and accurate profiling of gene abundances in the microbiome. *Genome Biol.*  
585 **16**, 53 (2015).
- 586 42. Altschul, S. F., Gish, W., Miller, W., Myers, E. W. & Lipman, D. J. Basic local alignment search  
587 tool. *J. Mol. Biol.* **215**, 403–410 (1990).
- 588 43. Petersen, L. M. *et al.* Community characteristics of the gut microbiomes of competitive  
589 cyclists. *Microbiome* **5**, 98 (2017).
- 590 44. Martin, M. Cutadapt removes adapter sequences from high-throughput sequencing reads.  
591 *EMBnet.journal* **17**, 10–12 (2011).
- 592 45. Wood, D. E., Lu, J. & Langmead, B. Improved metagenomic analysis with Kraken 2. *Genome*  
593 *Biol.* **20**, 257 (2019).
- 594 46. Li, H. & Durbin, R. Fast and accurate short read alignment with Burrows-Wheeler transform.  
595 *Bioinformatics* **25**, 1754–1760 (2009).
- 596 47. Li, H. *et al.* The Sequence Alignment/Map format and SAMtools. *Bioinformatics* **25**, 2078–  
597 2079 (2009).
- 598 48. Edgar, R. C. Search and clustering orders of magnitude faster than BLAST. *Bioinformatics* **26**,  
599 2460–2461 (2010).
- 600 49. Quinlan, A. R. & Hall, I. M. BEDTools: a flexible suite of utilities for comparing genomic  
601 features. *Bioinformatics* **26**, 841–842 (2010).
- 602 50. R Core Team. R: A language and environment for statistical computing. (2017).
- 603 51. McMurdie, P. J. & Holmes, S. phyloseq: An R Package for Reproducible Interactive Analysis  
604 and Graphics of Microbiome Census Data. *PLOS ONE* **8**, (2013).

- 605 52. Hyatt, D. *et al.* Prodigal: prokaryotic gene recognition and translation initiation site  
606 identification. *BMC Bioinformatics* **11**, 119 (2010).
- 607 53. Huerta-Cepas, J. *et al.* Fast Genome-Wide Functional Annotation through Orthology  
608 Assignment by eggNOG-Mapper. *Mol. Biol. Evol.* **34**, 2115–2122 (2017).
- 609 54. Buchfink, B., Xie, C. & Huson, D. H. Fast and sensitive protein alignment using DIAMOND.  
610 *Nat. Methods* **12**, 59–60 (2015).
- 611 55. Kanehisa, M. & Goto, S. KEGG: kyoto encyclopedia of genes and genomes. *Nucleic Acids*  
612 *Res.* **28**, 27–30 (2000).
- 613 56. Segata, N. *et al.* Metagenomic biomarker discovery and explanation. *Genome Biol.* **12**, R60  
614 (2011).
- 615
