# Supplementary material for: Genome-based targeted sequencing as a reproducible microbial community profiling assay
Source: bioRxiv or medRxiv preprint supplement (doi:10.1101/2020.08.07.241950), 2020-08-07
Supplement: Supplementary file [file media-2.pdf]

| Sample            | Total Reads | Mapped Reads | Unique Reads | On-Target Reads | Study Code | Additional Data | 16S Read Count | mWGS Mapped Reads |
|-------------------|-------------|--------------|--------------|-----------------|------------|-----------------|----------------|-------------------|
| CAST_L_T2_P1V2    | 3,538,249   | 3,463,218    | 3,008,160    | 2,477,332       | CCF        | mWGS            |                | 1,199,883         |
| CAST_L_T2_P1V4    | 4,128,629   | 4,075,711    | 3,620,097    | 3,024,607       | CCF        | mWGS            |                | 1,199,883         |
| B6J_2R1L_T2_P1V4  | 3,217,182   | 3,197,107    | 3,090,703    | 2,785,420       | CCF        | mWGS            |                | 1,592,601         |
| B6J_2R_T1_P2V2    | 3,238,300   | 3,215,252    | 3,194,358    | 2,691,469       | CCF        | mWGS            |                | 1,263,735         |
| B6J_2R_T1_P2V4    | 4,828,407   | 4,803,106    | 4,512,015    | 4,128,341       | CCF        | mWGS            |                | 1,263,735         |
| B6J_2R1L_T1_P2V2  | 3,315,661   | 3,295,397    | 3,279,764    | 2,646,630       | CCF        | mWGS            |                | 2,180,489         |
| B6J_2R1L_T1_P2V4  | 5,293,350   | 5,274,505    | 4,945,763    | 4,404,780       | CCF        | mWGS            |                | 2,180,489         |
| B6J_2R1L_T2_P1V2  | 2,743,736   | 2,710,214    | 2,601,317    | 2,263,225       | CCF        | mWGS            |                | 1,592,601         |
| B6J_3R_T1_P2V2    | 4,502,696   | 4,482,995    | 4,465,147    | 3,864,584       | CCF        | mWGS            |                | 2,078,380         |
| B6J_3R_T1_P2V4    | 5,413,147   | 5,394,310    | 5,196,451    | 4,751,589       | CCF        | mWGS            |                | 2,078,380         |
| B6J_3R_T5_P2V2    | 6,068,907   | 6,040,429    | 6,012,853    | 4,848,411       | CCF        | mWGS            |                | 2,557,725         |
| B6J_3R_T5_P2V4    | 4,799,462   | 4,779,150    | 4,547,947    | 4,093,635       | CCF        | mWGS            |                | 2,557,725         |
| B6J_B_T1_P2V2     | 2,654,000   | 2,601,851    | 2,554,927    | 2,108,249       | CCF        | mWGS            |                | 1,118,157         |
| B6J_B_T1_P2V4     | 2,517,711   | 2,474,516    | 2,267,359    | 2,065,729       | CCF        | mWGS            |                | 1,118,157         |
| B6J_L_T5_P2V2     | 4,754,565   | 4,738,546    | 4,712,663    | 3,866,190       | CCF        | mWGS            |                | 2,077,001         |
| B6J_L_T5_P2V4     | 6,121,807   | 6,101,981    | 5,967,043    | 5,473,721       | CCF        | mWGS            |                | 2,077,001         |
| B6J_R_T5_P2V2     | 2,489,055   | 2,478,987    | 2,470,029    | 2,024,308       | CCF        | mWGS            |                | 1,659,624         |
| B6J_R_T5_P2V4     | 2,536,981   | 2,527,998    | 2,442,305    | 2,258,105       | CCF        | mWGS            |                | 1,659,624         |
| CAST_2B_T1_P2V2   | 2,685,061   | 2,675,958    | 2,443,281    | 2,065,797       | CCF        | mWGS            |                | 2,255,415         |
| CAST_2B_T1_P2V4   | 2,262,321   | 2,256,367    | 2,103,224    | 1,894,700       | CCF        | mWGS            |                | 2,255,415         |
| CAST_2B_T5_P2V2   | 2,232,947   | 2,204,574    | 2,179,982    | 1,747,576       | CCF        | mWGS            |                | 2,884,361         |
| CAST_2B_T5_P2V4   | 2,612,646   | 2,577,040    | 2,356,541    | 2,100,283       | CCF        | mWGS            |                | 2,884,361         |
| CAST_2R1L_T1_P2V2 | 2,212,683   | 2,204,409    | 2,010,907    | 1,676,857       | CCF        | mWGS            |                | 1,796,698         |
| CAST_2R1L_T1_P2V4 | 2,276,619   | 2,269,419    | 2,106,040    | 1,883,781       | CCF        | mWGS            |                | 1,796,698         |
| CAST_2R1L_T2_P1V2 | 1,871,238   | 1,837,168    | 1,643,881    | 1,381,962       | CCF        | mWGS            |                | 1,624,570         |
| CAST_2R1L_T2_P1V4 | 2,643,994   | 2,594,733    | 2,328,648    | 2,030,119       | CCF        | mWGS            |                | 1,624,570         |
| CAST_2R1L_T5_P2V2 | 4,923,573   | 4,888,381    | 4,855,811    | 4,041,822       | CCF        | mWGS            |                | 1,485,578         |
| CAST_2R1L_T5_P2V4 | 4,967,176   | 4,938,501    | 4,773,656    | 4,387,351       | CCF        | mWGS            |                | 1,485,578         |
| CAST_3R_T5_P2V2   | 4,483,502   | 4,469,945    | 4,456,047    | 3,710,694       | CCF        | mWGS            |                | 1,963,198         |
| CAST_3R_T5_P2V4   | 4,933,032   | 4,920,595    | 4,756,506    | 4,355,956       | CCF        | mWGS            |                | 1,963,198         |
| CAST_B_T2_P1V2    | 3,029,171   | 3,007,803    | 2,629,445    | 2,162,203       | CCF        | mWGS            |                | 1,698,096         |
| CAST_B_T2_P1V4    | 3,920,378   | 3,901,545    | 3,477,083    | 2,880,738       | CCF        | mWGS            |                | 1,698,096         |
| CAST_B_T5_P2V2    | 2,742,127   | 2,730,979    | 2,720,707    | 2,227,446       | CCF        | mWGS            |                | 1,556,930         |
| CAST_B_T5_P2V4    | 3,297,866   | 3,286,678    | 3,161,407    | 2,874,609       | CCF        | mWGS            |                | 1,556,930         |
| CAST_L_T1_P2V2    | 2,572,514   | 2,552,764    | 2,406,680    | 2,033,586       | CCF        | mWGS            |                | 1,934,741         |
| CAST_L_T1_P2V4    | 3,655,883   | 3,635,047    | 3,414,573    | 3,168,668       | CCF        | mWGS            |                | 1,934,741         |
| CAST_N_T2_P1V2    | 1,643,600   | 1,624,265    | 1,454,447    | 1,196,743       | CCF        | mWGS            |                | 1,355,359         |
| CAST_N_T2_P1V4    | 1,625,977   | 1,614,315    | 1,446,293    | 1,229,234       | CCF        | mWGS            |                | 1,355,359         |
| CAST_N_T3_P2V2    | 3,008,736   | 2,994,015    | 2,979,353    | 2,388,688       | CCF        | mWGS            |                | 2,467,263         |
| CAST_N_T3_P2V4    | 3,635,261   | 3,625,577    | 3,402,188    | 3,150,852       | CCF        | mWGS            |                | 2,467,263         |
| CAST_R_T2_P1V2    | 2,060,652   | 2,044,533    | 1,790,501    | 1,481,878       | CCF        | mWGS            |                | 1,347,724         |
| CAST_R_T2_P1V4    | 2,568,781   | 2,559,562    | 2,263,056    | 1,867,295       | CCF        | mWGS            |                | 1,347,724         |
| CAST_R_T3_P2V2    | 3,074,781   | 3,060,900    | 2,875,804    | 2,400,294       | CCF        | mWGS            |                | 2,072,473         |
| CAST_R_T3_P2V4    | 4,651,224   | 4,640,804    | 4,363,023    | 4,062,138       | CCF        | mWGS            |                | 2,072,473         |
| CAST_R_T5_P2V2    | 1,552,076   | 1,542,807    | 1,534,954    | 1,245,932       | CCF        | mWGS            |                | 1,257,428         |
| CAST_R_T5_P2V4    | 1,947,227   | 1,936,456    | 1,757,833    | 1,589,676       | CCF        | mWGS            |                | 1,257,428         |
| PWK_2B_T1_P2V2    | 6,850,903   | 6,828,059    | 6,808,405    | 5,184,298       | CCF        | mWGS            |                | 1,680,050         |
| PWK_2B_T1_P2V4    | 4,700,651   | 4,690,531    | 4,235,591    | 3,694,563       | CCF        | mWGS            |                | 1,680,050         |
| PWK_2B_T3_P1V2    | 2,946,148   | 2,921,976    | 2,623,498    | 2,175,342       | CCF        | mWGS            |                | 1,401,587         |
| PWK_2B_T3_P1V4    | 1,541,417   | 1,533,867    | 1,387,641    | 1,185,499       | CCF        | mWGS            |                | 1,401,587         |
| PWK_2L_T1_P2V2    | 6,143,597   | 6,115,516    | 6,087,952    | 4,607,130       | CCF        | mWGS            |                | 1,120,223         |
| PWK_2L_T1_P2V4    | 5,876,098   | 5,858,957    | 5,338,608    | 4,650,757       | CCF        | mWGS            |                | 1,120,223         |
| PWK_2L_T3_P1V2    | 3,363,235   | 3,339,469    | 2,914,381    | 2,401,261       | CCF        | mWGS            |                | 1,140,268         |

|                |            |            |           |           |     |           |        |            |
|----------------|------------|------------|-----------|-----------|-----|-----------|--------|------------|
| PWK_2L_T3_P1V4 | 3,178,803  | 3,168,314  | 2,810,951 | 2,321,714 | CCF | mWGS      |        | 1,140,268  |
| PWK_2L_T4_P2V2 | 6,687,291  | 6,655,413  | 6,617,380 | 4,895,269 | CCF | mWGS      |        | 2,231,733  |
| PWK_2L_T4_P2V4 | 9,323,632  | 9,291,667  | 8,348,123 | 7,162,830 | CCF | mWGS      |        | 2,231,733  |
| PWK_2R_T1_P2V2 | 3,761,962  | 3,752,641  | 3,741,317 | 2,766,857 | CCF | mWGS      |        | 1,409,132  |
| PWK_2R_T1_P2V4 | 3,024,843  | 3,020,862  | 2,727,360 | 2,343,432 | CCF | mWGS      |        | 1,409,132  |
| PWK_2R_T3_P2V2 | 3,857,441  | 3,846,854  | 3,374,060 | 2,730,550 | CCF | mWGS      |        | 1,219,049  |
| PWK_2R_T3_P2V4 | 2,416,171  | 2,412,314  | 2,151,524 | 1,811,880 | CCF | mWGS      |        | 1,219,049  |
| PWK_2R_T4_P2V2 | 3,486,917  | 3,476,494  | 3,462,740 | 2,508,432 | CCF | mWGS      |        | 1,954,048  |
| PWK_2R_T4_P2V4 | 3,768,274  | 3,762,253  | 3,345,506 | 2,801,000 | CCF | mWGS      |        | 1,954,048  |
| PWK_3R_T3_P2V2 | 2,079,710  | 2,050,161  | 1,856,245 | 1,554,683 | CCF | mWGS      |        | 1,191,034  |
| PWK_3R_T3_P2V4 | 1,674,525  | 1,659,813  | 1,539,458 | 1,387,075 | CCF | mWGS      |        | 1,191,034  |
| PWK_B_T1_P2V2  | 4,170,890  | 4,157,567  | 4,141,318 | 3,023,607 | CCF | mWGS      |        | 1,389,340  |
| PWK_B_T1_P2V4  | 3,583,695  | 3,577,614  | 3,212,885 | 2,725,886 | CCF | mWGS      |        | 1,389,340  |
| PWK_B_T4_P2V2  | 2,532,095  | 2,522,780  | 2,511,074 | 1,842,649 | CCF | mWGS      |        | 1,619,583  |
| PWK_B_T4_P2V4  | 1,737,479  | 1,733,473  | 1,557,251 | 1,330,146 | CCF | mWGS      |        | 1,619,583  |
| PWK_L_T3_P1V2  | 3,533,600  | 3,505,220  | 3,083,149 | 2,551,442 | CCF | mWGS      |        | 1,275,775  |
| PWK_L_T3_P1V4  | 3,650,460  | 3,623,743  | 3,271,737 | 2,798,992 | CCF | mWGS      |        | 1,275,775  |
| PWK_L_T4_P2V2  | 3,386,912  | 3,371,982  | 3,357,096 | 2,452,558 | CCF | mWGS      |        | 4,415,351  |
| PWK_L_T4_P2V4  | 4,140,186  | 4,128,183  | 3,649,367 | 3,111,291 | CCF | mWGS      |        | 4,415,351  |
| PWK_N_T1_P2V2  | 3,001,569  | 2,990,940  | 2,982,462 | 2,286,341 | CCF | mWGS      |        | 1,671,759  |
| PWK_N_T1_P2V4  | 3,795,097  | 3,788,493  | 3,457,924 | 3,016,068 | CCF | mWGS      |        | 1,671,759  |
| PWK_N_T3_P2V2  | 2,756,754  | 2,745,369  | 2,467,976 | 2,010,716 | CCF | mWGS      |        | 1,149,129  |
| PWK_N_T3_P2V4  | 2,769,496  | 2,763,170  | 2,504,229 | 2,166,767 | CCF | mWGS      |        | 1,149,129  |
| PWK_N_T4_P2V2  | 2,300,009  | 2,292,741  | 2,285,772 | 1,729,093 | CCF | mWGS      |        | 2,667,835  |
| PWK_N_T4_P2V4  | 3,181,120  | 3,177,884  | 2,886,321 | 2,511,758 | CCF | mWGS      |        | 2,667,835  |
| PWK_R_T1_P2V2  | 2,843,593  | 2,831,716  | 2,818,433 | 2,226,897 | CCF | mWGS      |        | 1,664,158  |
| PWK_R_T1_P2V4  | 3,136,832  | 3,127,395  | 2,946,925 | 2,636,437 | CCF | mWGS      |        | 1,664,158  |
| 4M7_TD_P1V2    | 3,070,474  | 3,036,359  | 2,812,515 | 2,329,458 | HLB | mWGS, 16S | 13,843 | 14,536,240 |
| 4M7_TD_P1V4    | 4,217,339  | 4,158,973  | 3,777,222 | 3,369,637 | HLB | mWGS, 16S | 13,843 | 14,536,240 |
| BF2_TD_P1V2    | 3,786,113  | 3,753,536  | 3,232,204 | 2,647,525 | HLB | mWGS, 16S | 17,306 | 17,562,416 |
| BF2_TD_P1V4    | 3,703,215  | 3,679,057  | 3,203,312 | 2,877,310 | HLB | mWGS, 16S | 17,306 | 17,562,416 |
| BF4_3D_P1V2    | 4,926,938  | 4,867,156  | 4,231,938 | 3,456,253 | HLB | mWGS, 16S | 23,858 | 20,657,550 |
| BF4_3D_P1V4    | 7,419,491  | 7,325,177  | 6,303,220 | 5,578,788 | HLB | mWGS, 16S | 23,858 | 20,657,550 |
| BM3_3D_P1V2    | 3,763,740  | 3,704,633  | 3,253,850 | 2,687,844 | HLB | mWGS, 16S | 18,739 | 16,036,400 |
| BM3_3D_P1V4    | 2,540,999  | 2,485,541  | 2,162,079 | 1,921,752 | HLB | mWGS, 16S | 18,739 | 16,036,400 |
| BF1_3D_P1V4    | 11,817,206 | 11,609,732 | 9,594,628 | 8,493,872 | HLB | mWGS, 16S | 19,112 | 16,128,555 |
| 4F6_3D_P1V2    | 2,279,215  | 2,262,079  | 2,087,399 | 1,741,066 | HLB | mWGS, 16S | 20,726 | 11,977,157 |
| 4F6_3D_P1V4    | 2,923,298  | 2,900,381  | 2,605,545 | 2,256,145 | HLB | mWGS, 16S | 20,726 | 11,977,157 |
| 4F7_OD_P1V2    | 4,108,993  | 4,050,220  | 3,887,878 | 3,260,226 | HLB | mWGS, 16S | 20,538 | 14,813,704 |
| 4F7_OD_P1V4    | 4,842,696  | 4,739,134  | 4,414,955 | 3,881,842 | HLB | mWGS, 16S | 20,538 | 14,813,704 |
| 4F7_TD_P1V2    | 2,749,784  | 2,717,855  | 2,499,177 | 2,065,976 | HLB | mWGS, 16S | 17,344 | 21,087,960 |
| 4F7_TD_P1V4    | 3,135,735  | 3,095,312  | 2,765,724 | 2,441,845 | HLB | mWGS, 16S | 17,344 | 21,087,960 |
| 4F8_OD_P1V2    | 3,680,925  | 3,647,783  | 3,565,836 | 2,992,261 | HLB | mWGS, 16S | 25,643 | 26,843,938 |
| 4F8_OD_P1V4    | 4,095,909  | 4,026,164  | 3,832,913 | 3,375,260 | HLB | mWGS, 16S | 25,643 | 26,843,938 |
| 4M1_OD_P1V2    | 2,988,400  | 2,912,627  | 2,777,891 | 2,335,125 | HLB | mWGS, 16S | 19,016 | 20,210,235 |
| 4M1_OD_P1V4    | 3,362,849  | 3,249,859  | 3,047,950 | 2,684,084 | HLB | mWGS, 16S | 19,016 | 20,210,235 |
| 4M1_TD_P1V2    | 1,886,222  | 1,842,969  | 1,694,802 | 1,386,882 | HLB | mWGS, 16S | 19,134 | 15,466,619 |
| 4M1_TD_P1V4    | 2,329,992  | 2,269,364  | 2,062,076 | 1,785,659 | HLB | mWGS, 16S | 19,134 | 15,466,619 |
| 4M3_OD_P1V2    | 2,243,817  | 2,179,653  | 2,029,830 | 1,682,699 | HLB | mWGS, 16S | 20,114 | 20,631,558 |
| 4M3_OD_P1V4    | 3,391,841  | 3,249,050  | 2,953,131 | 2,542,524 | HLB | mWGS, 16S | 20,114 | 20,631,558 |
| 4M3_TD_P1V2    | 1,941,052  | 1,905,829  | 1,780,845 | 1,500,845 | HLB | mWGS, 16S | N/A    | 12,800,828 |
| 4M3_TD_P1V4    | 2,734,471  | 2,670,658  | 2,474,377 | 2,204,178 | HLB | mWGS, 16S | N/A    | 12,800,828 |
| 4M5_OD_P1V2    | 2,885,483  | 2,845,952  | 2,737,956 | 2,258,034 | HLB | mWGS, 16S | 17,908 | 9,206,898  |
| 4M5_OD_P1V4    | 6,109,395  | 5,955,736  | 5,510,834 | 4,924,147 | HLB | mWGS, 16S | 17,908 | 9,206,898  |
| 4M6_OD_P1V2    | 3,282,804  | 3,260,945  | 3,113,238 | 2,608,554 | HLB | mWGS, 16S | 16,261 | 11,791,275 |
| 4M6_OD_P1V4    | 4,735,775  | 4,675,061  | 4,296,485 | 3,875,883 | HLB | mWGS, 16S | 16,261 | 11,791,275 |

|                        |            |            |           |           |            |           |        |            |
|------------------------|------------|------------|-----------|-----------|------------|-----------|--------|------------|
| 4M6_TD_P1V2            | 2,056,491  | 2,039,847  | 1,896,313 | 1,568,065 | HLB        | mWGS, 16S | 14,840 | 12,270,221 |
| 4M6_TD_P1V4            | 4,001,805  | 3,963,407  | 3,640,111 | 3,217,749 | HLB        | mWGS, 16S | 14,840 | 12,270,221 |
| 4M7_OD_P1V2            | 2,899,401  | 2,873,617  | 2,741,280 | 2,282,043 | HLB        | mWGS, 16S | 14,413 | 12,370,629 |
| 4M7_OD_P1V4            | 5,252,191  | 5,148,391  | 4,683,041 | 4,196,176 | HLB        | mWGS, 16S | 14,413 | 12,370,629 |
| 4M7_3D_P1V2            | 332,738    | 327,480    | 298,705   | 250,132   | HLB        | mWGS, 16S | 21,708 | 12,816,146 |
| 4M7_3D_P1V4            | 3,104,676  | 3,052,663  | 2,754,386 | 2,432,690 | HLB        | mWGS, 16S | 21,708 | 12,816,146 |
| BF1_3D_P1V2            | 4,349,421  | 4,290,670  | 3,608,813 | 2,918,302 | HLB        | mWGS, 16S | 19,112 | 16,128,555 |
| BF1_TD_P1V2            | 4,349,084  | 4,301,643  | 3,718,700 | 3,077,284 | HLB        | mWGS, 16S | 15,258 | 19,063,564 |
| BF1_TD_P1V4            | 10,818,241 | 10,725,494 | 9,395,150 | 8,412,329 | HLB        | mWGS, 16S | 15,258 | 19,063,564 |
| BF2_OD_P1V2            | 1,036,862  | 1,022,884  | 990,237   | 822,017   | HLB        | mWGS, 16S | 16,350 | 16,094,974 |
| BF2_OD_P1V4            | 2,887,509  | 2,833,867  | 2,716,200 | 2,459,640 | HLB        | mWGS, 16S | 16,350 | 16,094,974 |
| BF2_3D_P1V2            | 4,463,930  | 4,408,625  | 3,922,982 | 3,187,687 | HLB        | mWGS, 16S | 20,352 | 16,996,156 |
| BF2_3D_P1V4            | 5,144,660  | 5,080,285  | 4,468,054 | 3,948,631 | HLB        | mWGS, 16S | 20,352 | 16,996,156 |
| BF3_OD_P1V2            | 1,076,265  | 1,059,622  | 1,009,364 | 839,454   | HLB        | mWGS, 16S | 14,604 | 4,173,812  |
| BF3_OD_P1V4            | 1,480,319  | 1,452,153  | 1,378,522 | 1,250,574 | HLB        | mWGS, 16S | 14,604 | 4,173,812  |
| BF3_TD_P1V2            | 3,886,155  | 3,835,072  | 3,230,264 | 2,617,684 | HLB        | mWGS, 16S | 19,094 | 22,040,550 |
| BF3_TD_P1V4            | 6,609,591  | 6,554,349  | 5,651,804 | 5,047,968 | HLB        | mWGS, 16S | 19,094 | 22,040,550 |
| BM1_OD_P1V2            | 405,147    | 398,951    | 384,314   | 319,025   | HLB        | mWGS, 16S | 20,775 | 2,145,125  |
| BM1_OD_P1V4            | 908,874    | 894,866    | 857,860   | 777,637   | HLB        | mWGS, 16S | 20,775 | 2,145,125  |
| BM1_3D_P1V2            | 3,959,852  | 3,932,255  | 3,631,267 | 3,087,740 | HLB        | mWGS, 16S | 21,829 | 17,036,259 |
| BM1_3D_P1V4            | 3,554,852  | 3,524,837  | 3,263,947 | 2,924,582 | HLB        | mWGS, 16S | 21,829 | 17,036,259 |
| BM1_TD_P1V2            | 3,780,907  | 3,724,486  | 3,290,011 | 2,705,698 | HLB        | mWGS, 16S | 20,138 | 16,170,189 |
| BM1_TD_P1V4            | 5,595,070  | 5,493,890  | 4,848,802 | 4,314,952 | HLB        | mWGS, 16S | 20,138 | 16,170,189 |
| BM2_OD_P1V2            | 470,614    | 461,780    | 442,711   | 368,151   | HLB        | mWGS, 16S | 18,099 | 380,675    |
| BM2_OD_P1V4            | 601,847    | 581,695    | 544,661   | 494,357   | HLB        | mWGS, 16S | 18,099 | 380,675    |
| BM2_TD_P1V2            | 6,646,497  | 6,566,074  | 5,777,723 | 4,772,685 | HLB        | mWGS, 16S | 21,880 | 19,304,612 |
| BM2_TD_P1V4            | 7,952,150  | 7,843,074  | 6,941,847 | 6,218,731 | HLB        | mWGS, 16S | 21,880 | 19,304,612 |
| BM3_OD_P1V2            | 8,031,520  | 7,912,289  | 7,497,222 | 6,158,660 | HLB        | mWGS, 16S | 20,054 | 18,817,236 |
| BM3_OD_P1V4            | 8,541,347  | 8,443,523  | 7,974,767 | 7,187,515 | HLB        | mWGS, 16S | 20,054 | 18,817,236 |
| A_2_F01A_P2V4          | 3,391,647  | 3,382,935  | 3,311,152 | 3,005,214 | VNDR       | 16S       | 15,441 |            |
| A_1_M46A_P2V2          | 2,161,998  | 2,134,107  | 1,945,192 | 1,635,696 | VNDR       | 16S       | 22,385 |            |
| A_1_M46A_P2V4          | 2,736,372  | 2,706,418  | 2,424,260 | 2,128,711 | VNDR       | 16S       | 22,385 |            |
| A_2_F01A_P2V2          | 1,989,779  | 1,983,378  | 1,924,039 | 1,609,975 | VNDR       | 16S       | 15,441 |            |
| B_3_M51B_P2V2          | 2,973,987  | 2,961,913  | 2,753,108 | 2,462,391 | VNDR       | 16S       | 19,170 |            |
| B_3_M51B_P2V4          | 4,285,064  | 4,274,413  | 4,038,946 | 3,797,165 | VNDR       | 16S       | 19,170 |            |
| Ecoli_P1V2             | 2,735,448  | 2,732,889  | 2,157,203 | 2,086,420 | This study |           |        |            |
| ecoli_P2V2             | 5,526,780  | 5,521,930  | 4,417,647 | 4,257,598 | This study |           |        |            |
| ecoli_P1V4             | 4,063,753  | 4,058,214  | 2,420,869 | 1,924,636 | This study |           |        |            |
| ecoli_P2V4             | 6,183,444  | 6,178,204  | 3,833,500 | 3,103,533 | This study |           |        |            |
| human_stool_P1V2       | 328,929    | 324,202    | 289,074   | 260,278   | This study |           |        |            |
| human_stool_P2V2       | 277,616    | 273,845    | 243,484   | 218,040   | This study |           |        |            |
| human_stool_P1V4       | 452,413    | 450,956    | 380,204   | 352,381   | This study |           |        |            |
| human_stool_P2V4       | 576,879    | 575,295    | 484,286   | 452,870   | This study |           |        |            |
| zymo_mock_P1V2         | 1,506,453  | 1,502,222  | 1,277,278 | 1,179,509 | This study |           |        |            |
| zymo_mock_P2V2         | 1,324,645  | 1,321,668  | 1,131,085 | 1,039,500 | This study |           |        |            |
| zymo_mock_P1V4         | 848,994    | 846,842    | 564,505   | 464,554   | This study |           |        |            |
| zymo_mock_P2V4         | 1,809,909  | 1,806,699  | 1,228,518 | 1,019,616 | This study |           |        |            |
| NTC_CCF_VNDR_KOMP_P2V2 | 747        | 745        | 632       | 473       | This study |           |        |            |
| NTC_CCF_VNDR_KOMP_P2V4 | 3,649      | 3,648      | 3,648     | 3,545     | This study |           |        |            |
| NTC_HL44_P1V2          | 592        | 572        | 533       | 468       | This study |           |        |            |
| NTC_HL44_P1V4          | 3,416      | 3,403      | 3,391     | 3,178     | This study |           |        |            |
