# Supplementary material for: Genome-based targeted sequencing as a reproducible microbial community profiling assay
Source: bioRxiv or medRxiv preprint supplement (doi:10.1101/2020.08.07.241950), 2020-08-07
Supplement: Supplementary file [file media-3.pdf]

|         |                                             |                                                     | HLB vs. B6 (HF) |        |         |        |        |         | HLB vs. B6 (Chow) |        |         |        |        |         | HLB (Chow vs. HF) |        |         |       |        |         | B6 (Chow vs. HF) |        |         |       |        |         |
|---------|---------------------------------------------|-----------------------------------------------------|-----------------|--------|---------|--------|--------|---------|-------------------|--------|---------|--------|--------|---------|-------------------|--------|---------|-------|--------|---------|------------------|--------|---------|-------|--------|---------|
|         |                                             |                                                     | Allegro         |        |         | JAX    |        |         | Allegro           |        |         | JAX    |        |         | Allegro           |        |         | JAX   |        |         | Allegro          |        |         | JAX   |        |         |
| KO      | Pathway Class                               | Pathway                                             | Class           | LDA    | p-value | Class  | LDA    | p-value | Class             | LDA    | p-value | Class  | LDA    | p-value | Class             | LDA    | p-value | Class | LDA    | p-value | Class            | LDA    | p-value | Class | LDA    | p-value |
| ko00400 | Amino Acid Metabolism                       | Phenylalanine, tyrosine and tryptophan biosynthesis | B6              | -2.045 | 0.023   | B6     | -2.395 | 0.005   | -                 | -      | -       | -      | -      | -       | Chow              | -2.18  | 0.015   | Chow  | -2.203 | 0.022   | -                | -      | -       | -     | -      | -       |
| ko00290 | Amino Acid Metabolism                       | Valine, leucine and isoleucine biosynthesis         | B6              | -2.022 | 0.023   | B6     | -2.072 | 0.03    | B6                | -2.515 | 0.004   | B6     | -2.476 | 0.004   | HF                | 2.617  | 0.003   | HF    | 2.597  | 0.003   | HF               | 2.252  | 0.002   | HF    | 2.299  | 0.002   |
| ko00220 | Amino Acid Metabolism                       | Arginine biosynthesis                               | B6              | -2.158 | 0.007   | B6     | -2.13  | 0.002   | -                 | -      | -       | -      | -      | -       | Chow              | -2.363 | 0.007   | Chow  | -2.308 | 0.01    | -                | -      | -       | -     | -      | -       |
| ko00471 | Amino Acid Metabolism                       | D-Glutamine and D-glutamate metabolism              | B6              | -2.097 | 0.001   | B6     | -2.203 | 0.001   | HLB444            | 2.317  | 0.004   | HLB444 | 2.287  | 0.004   | Chow              | -2.488 | 0.003   | Chow  | -2.494 | 0.003   | -                | -      | -       | -     | -      | -       |
| ko00450 | Amino Acid Metabolism                       | Selenocompound metabolism                           | HLB444          | 2.241  | 0.001   | HLB444 | 2.303  | 0.001   | -                 | -      | -       | B6     | -2.015 | 0.004   | HF                | 2.455  | 0.003   | HF    | 2.456  | 0.003   | -                | -      | -       | -     | -      | -       |
| ko00270 | Amino Acid Metabolism                       | Cysteine and methionine metabolism                  | HLB444          | 2.345  | 0.001   | HLB444 | 2.345  | 0.001   | -                 | -      | -       | -      | -      | -       | HF                | 2.552  | 0.003   | HF    | 2.54   | 0.003   | HF               | 2.243  | 0.002   | HF    | 2.241  | 0.01    |
| ko00300 | Amino Acid Metabolism                       | Lysine biosynthesis                                 | -               | -      | -       | -      | -      | -       | B6                | -2.192 | 0.004   | B6     | -2.218 | 0.019   | HF                | 2.466  | 0.003   | HF    | 2.434  | 0.003   | HF               | 2.341  | 0.002   | HF    | 2.331  | 0.002   |
| ko00350 | Amino Acid Metabolism                       | Tyrosine metabolism                                 | -               | -      | -       | -      | -      | -       | B6                | -2.217 | 0.004   | B6     | -2.167 | 0.004   | HF                | 2.439  | 0.003   | HF    | 2.42   | 0.003   | HF               | 2.195  | 0.002   | HF    | 2.247  | 0.002   |
| ko00340 | Amino Acid Metabolism                       | Histidine metabolism                                | -               | -      | -       | -      | -      | -       | B6                | -2.209 | 0.012   | -      | -      | -       | HF                | 2.482  | 0.003   | HF    | 2.468  | 0.003   | HF               | 2.23   | 0.002   | HF    | 2.292  | 0.002   |
| ko00250 | Amino Acid Metabolism                       | Alanine, aspartate and glutamate metabolism         | -               | -      | -       | -      | -      | -       | HLB444            | 2.532  | 0.004   | HLB444 | 2.516  | 0.004   | Chow              | -2.82  | 0.003   | Chow  | -2.797 | 0.003   | Chow             | -2.483 | 0.002   | Chow  | -2.586 | 0.002   |
| ko00260 | Amino Acid Metabolism                       | Glycine, serine and threonine metabolism            | -               | -      | -       | B6     | -2.124 | 0.002   | HLB444            | 2.084  | 0.028   | HLB444 | 2.318  | 0.012   | -                 | -      | -       | -     | -      | -       | HF               | 2.351  | 0.002   | HF    | 2.524  | 0.002   |
| ko00430 | Amino Acid Metabolism                       | Taurine and hypotaurine metabolism                  | -               | -      | -       | -      | -      | -       | HLB444            | 2.256  | 0.004   | HLB444 | 2.251  | 0.007   | Chow              | -2.409 | 0.003   | Chow  | -2.39  | 0.003   | Chow             | -2.108 | 0.002   | Chow  | -2.171 | 0.002   |
| ko00280 | Amino Acid Metabolism                       | Valine, leucine and isoleucine degradation          | -               | -      | -       | -      | -      | -       | HLB444            | 2.546  | 0.012   | HLB444 | 2.643  | 0.007   | Chow              | -2.688 | 0.004   | Chow  | -2.659 | 0.004   | -                | -      | -       | -     | -      | -       |
| ko00410 | Amino Acid Metabolism                       | beta-Alanine metabolism                             | -               | -      | -       | -      | -      | -       | HLB444            | 2.055  | 0.004   | HLB444 | 2.147  | 0.004   | Chow              | -2.261 | 0.003   | Chow  | -2.248 | 0.003   | -                | -      | -       | -     | -      | -       |
| ko00330 | Amino Acid Metabolism                       | Arginine and proline metabolism                     | -               | -      | -       | -      | -      | -       | HLB444            | 2.254  | 0.007   | HLB444 | 2.372  | 0.004   | Chow              | -2.562 | 0.003   | Chow  | -2.554 | 0.003   | Chow             | -2.282 | 0.002   | -     | -      | -       |
| ko00460 | Amino Acid Metabolism                       | Cyanoamino acid metabolism                          | -               | -      | -       | HLB444 | 2.07   | 0.005   | -                 | -      | -       | -      | -      | -       | Chow              | -2.212 | 0.01    | Chow  | -2.196 | 0.01    | Chow             | -2.484 | 0.002   | Chow  | -2.536 | 0.002   |
| ko00440 | Amino Acid Metabolism                       | Phosphonate and phosphinate metabolism              | -               | -      | -       | -      | -      | -       | -                 | -      | -       | -      | -      | -       | HF                | 2.213  | 0.003   | HF    | 2.184  | 0.003   | HF               | 2.075  | 0.002   | HF    | 2.036  | 0.002   |
| ko00310 | Amino Acid Metabolism                       | Lysine degradation                                  | -               | -      | -       | -      | -      | -       | -                 | -      | -       | -      | -      | -       | HF                | 2.315  | 0.003   | HF    | 2.305  | 0.003   | HF               | 2.183  | 0.002   | HF    | 2.255  | 0.002   |
| ko00360 | Amino Acid Metabolism                       | Phenylalanine metabolism                            | -               | -      | -       | -      | -      | -       | -                 | -      | -       | -      | -      | -       | HF                | 2.205  | 0.003   | HF    | 2.212  | 0.003   | -                | -      | -       | -     | -      | -       |
| ko00480 | Amino Acid Metabolism                       | Glutathione metabolism                              | -               | -      | -       | HLB444 | 2.034  | 0.002   | -                 | -      | -       | -      | -      | -       | HF                | 2.118  | 0.004   | HF    | 2.13   | 0.004   | -                | -      | -       | -     | -      | -       |
| ko00380 | Amino Acid Metabolism                       | Tryptophan metabolism                               | -               | -      | -       | -      | -      | -       | -                 | -      | -       | -      | -      | -       | -                 | -      | -       | -     | -      | -       | -                | -      | -       | HF    | 2.076  | 0.002   |
| ko01130 | Biosynthesis of antibiotics                 | Biosynthesis of antibiotics                         | B6              | -2.591 | 0.002   | B6     | -2.708 | 0.001   | -                 | -      | -       | -      | -      | -       | -                 | -      | -       | -     | -      | -       | HF               | 2.358  | 0.037   | HF    | 2.656  | 0.002   |
| ko00521 | Biosynthesis of other Secondary Metabolites | Streptomycin biosynthesis                           | B6              | -2.07  | 0.017   | -      | -      | -       | -                 | -      | -       | HLB444 | 2.057  | 0.028   | Chow              | -2.526 | 0.003   | Chow  | -2.493 | 0.003   | Chow             | -2.191 | 0.002   | Chow  | -2.133 | 0.005   |
| ko00401 | Biosynthesis of other Secondary Metabolites | Novobiocin biosynthesis                             | -               | -      | -       | -      | -      | -       | B6                | -2.035 | 0.004   | -      | -      | -       | HF                | 2.339  | 0.003   | HF    | 2.323  | 0.003   | HF               | 2.208  | 0.002   | HF    | 2.289  | 0.002   |

|         |                                             |                                                        |        |        |       |        |        |       |        |        |       |        |        |       |      |        |       |      |        |       |        |        |       |        |        |       |
|---------|---------------------------------------------|--------------------------------------------------------|--------|--------|-------|--------|--------|-------|--------|--------|-------|--------|--------|-------|------|--------|-------|------|--------|-------|--------|--------|-------|--------|--------|-------|
| ko00525 | Biosynthesis of other Secondary Metabolites | Acarbose and validamycin biosynthesis                  | -      | -      | -     | -      | -      | -     | HLB444 | 2.011  | 0.028 | HLB444 | 2.1    | 0.019 | Chow | -2.568 | 0.003 | Chow | -2.554 | 0.003 | Chow   | -2.3   | 0.002 | Chow   | -2.28  | 0.002 |
| ko00901 | Biosynthesis of other Secondary Metabolites | Indole alkaloid biosynthesis                           | -      | -      | -     | -      | -      | -     | HLB444 | 2.117  | 0.015 | HLB444 | 2.195  | 0.004 | -    | -      | -     | -    | -      | -     | -      | -      | -     | -      | -      | -     |
| ko00311 | Biosynthesis of other Secondary Metabolites | Penicillin and cephalosporin biosynthesis              | -      | -      | -     | -      | -      | -     | -      | -      | -     | -      | -      | -     | Chow | -2.053 | 0.003 | Chow | -2.006 | 0.003 | -      | -      | -     | -      | -      | -     |
| ko00940 | Biosynthesis of other Secondary Metabolites | Phenylpropanoid biosynthesis                           | -      | -      | -     | HLB444 | 2.132  | 0.001 | -      | -      | -     | B6     | -2.029 | 0.019 | Chow | -2.228 | 0.003 | Chow | -2.221 | 0.003 | Chow   | -2.56  | 0.002 | Chow   | -2.61  | 0.002 |
| ko00524 | Biosynthesis of other Secondary Metabolites | Neomycin, kanamycin and gentamicin biosynthesis        | -      | -      | -     | -      | -      | -     | -      | -      | -     | -      | -      | -     | HF   | 2.136  | 0.003 | HF   | 2.133  | 0.003 | HF     | 2.132  | 0.002 | HF     | 2.091  | 0.002 |
| ko00960 | Biosynthesis of other Secondary Metabolites | Tropane, piperidine and pyridine alkaloid biosynthesis | -      | -      | -     | -      | -      | -     | -      | -      | -     | -      | -      | -     | HF   | 2.133  | 0.003 | HF   | 2.111  | 0.003 | HF     | 2.005  | 0.002 | HF     | 2.08   | 0.002 |
| ko00232 | Biosynthesis of other Secondary Metabolites | Caffeine metabolism                                    | -      | -      | -     | -      | -      | -     | -      | -      | -     | -      | -      | -     | HF   | 2.181  | 0.003 | HF   | 2.238  | 0.003 | -      | -      | -     | -      | -      | -     |
| ko00261 | Biosynthesis of other Secondary Metabolites | Monobactam biosynthesis                                | -      | -      | -     | -      | -      | -     | -      | -      | -     | B6     | -2.063 | 0.004 | -    | -      | -     | -    | -      | -     | -      | -      | -     | -      | -      | -     |
| ko00620 | Carbohydrate Metabolism                     | Pyruvate metabolism                                    | B6     | -2.132 | 0.005 | B6     | -2.174 | 0.002 | HLB444 | 2.422  | 0.004 | HLB444 | 2.467  | 0.004 | Chow | -2.18  | 0.022 | Chow | -2.138 | 0.032 | HF     | 2.385  | 0.002 | HF     | 2.473  | 0.002 |
| ko00020 | Carbohydrate Metabolism                     | Citrate cycle (TCA cycle)                              | B6     | -2.624 | 0.001 | B6     | -2.674 | 0.001 | HLB444 | 2.334  | 0.042 | HLB444 | 2.529  | 0.028 | Chow | -2.736 | 0.004 | Chow | -2.736 | 0.004 | -      | -      | -     | HF     | 2.343  | 0.027 |
| ko00500 | Carbohydrate Metabolism                     | Starch and sucrose metabolism                          | HLB444 | 2.826  | 0.001 | HLB444 | 2.89   | 0.001 | HLB444 | 2.39   | 0.028 | -      | -      | -     | Chow | -2.781 | 0.003 | Chow | -2.728 | 0.015 | Chow   | -3.002 | 0.002 | Chow   | -3.096 | 0.002 |
| ko00040 | Carbohydrate Metabolism                     | Pentose and glucuronate interconversions               | HLB444 | 2.478  | 0.001 | HLB444 | 2.622  | 0.001 | B6     | -2.84  | 0.004 | B6     | -2.863 | 0.004 | -    | -      | -     | -    | -      | -     | Chow   | -3.049 | 0.002 | Chow   | -3.105 | 0.002 |
| ko00520 | Carbohydrate Metabolism                     | Amino sugar and nucleotide sugar metabolism            | HLB444 | 2.673  | 0.003 | HLB444 | 2.752  | 0.002 | B6     | -2.649 | 0.004 | B6     | -2.686 | 0.007 | -    | -      | -     | -    | -      | -     | Chow   | -2.869 | 0.002 | Chow   | -2.932 | 0.002 |
| ko00052 | Carbohydrate Metabolism                     | Galactose metabolism                                   | HLB444 | 2.316  | 0.007 | HLB444 | 2.246  | 0.017 | HLB444 | 2.393  | 0.004 | HLB444 | 2.318  | 0.004 | Chow | -2.359 | 0.032 | Chow | -2.351 | 0.046 | Chow   | -2.28  | 0.002 | Chow   | -2.27  | 0.002 |
| ko00051 | Carbohydrate Metabolism                     | Fructose and mannose metabolism                        | HLB444 | 2.666  | 0.002 | HLB444 | 2.634  | 0.001 | HLB444 | 2.407  | 0.004 | HLB444 | 2.315  | 0.004 | Chow | -2.803 | 0.003 | Chow | -2.748 | 0.003 | Chow   | -2.929 | 0.002 | Chow   | -2.894 | 0.002 |
| ko00030 | Carbohydrate Metabolism                     | Pentose phosphate pathway                              | HLB444 | 2.634  | 0.001 | HLB444 | 2.705  | 0.001 | B6     | -2.408 | 0.019 | B6     | -2.548 | 0.012 | HF   | 2.879  | 0.003 | HF   | 2.857  | 0.003 | -      | -      | -     | -      | -      | -     |
| ko00562 | Carbohydrate Metabolism                     | Inositol phosphate metabolism                          | -      | -      | -     | -      | -      | -     | B6     | -2.08  | 0.004 | B6     | -2.012 | 0.004 | HF   | 2.108  | 0.015 | HF   | 2.181  | 0.003 | -      | -      | -     | -      | -      | -     |
| ko00660 | Carbohydrate Metabolism                     | C5-Branched dibasic acid metabolism                    | -      | -      | -     | -      | -      | -     | B6     | -2.352 | 0.007 | B6     | -2.344 | 0.012 | HF   | 2.51   | 0.003 | HF   | 2.497  | 0.003 | HF     | 2.065  | 0.003 | HF     | 2.064  | 0.007 |
| ko00010 | Carbohydrate Metabolism                     | Glycolysis / Gluconeogenesis                           | -      | -      | -     | -      | -      | -     | HLB444 | 2.152  | 0.004 | HLB444 | 2.054  | 0.004 | HF   | 2.504  | 0.003 | HF   | 2.543  | 0.003 | HF     | 2.57   | 0.002 | HF     | 2.572  | 0.002 |
| ko00640 | Carbohydrate Metabolism                     | Propanoate metabolism                                  | -      | -      | -     | -      | -      | -     | HLB444 | 2.078  | 0.028 | -      | -      | -     | -    | -      | -     | -    | -      | -     | -      | -      | -     | -      | -      | -     |
| ko00630 | Carbohydrate Metabolism                     | Glyoxylate and dicarboxylate metabolism                | -      | -      | -     | B6     | -2.086 | 0.039 | HLB444 | 2.228  | 0.028 | HLB444 | 2.414  | 0.019 | Chow | -2.729 | 0.003 | Chow | -2.726 | 0.003 | Chow   | -2.471 | 0.002 | Chow   | -2.252 | 0.007 |
| ko00053 | Carbohydrate Metabolism                     | Ascorbate and aldarate metabolism                      | -      | -      | -     | -      | -      | -     | -      | -      | -     | -      | -      | -     | -    | -      | -     | -    | -      | Chow  | -2.209 | 0.002  | Chow  | -2.18  | 0.002  |       |
| ko00650 | Carbohydrate Metabolism                     | Butanoate metabolism                                   | -      | -      | -     | -      | -      | -     | -      | -      | -     | -      | -      | -     | -    | -      | -     | -    | -      | -     | -      | -      | Chow  | -2.161 | 0.003  |       |
| ko02040 | Cell Motility                               | Flagellar assembly                                     | HLB444 | 3.062  | 0.002 | HLB444 | 3.132  | 0.002 | B6     | -2.77  | 0.028 | B6     | -2.879 | 0.028 | HF   | 3.292  | 0.003 | HF   | 3.288  | 0.004 | -      | -      | -     | -      | -      | -     |
| ko02030 | Cell Motility                               | Bacterial chemotaxis                                   | HLB444 | 3.182  | 0.001 | HLB444 | 3.245  | 0.001 | B6     | -2.822 | 0.028 | B6     | -2.966 | 0.028 | HF   | 3.284  | 0.004 | HF   | 3.286  | 0.004 | -      | -      | -     | Chow   | -2.809 | 0.014 |
| ko02025 | Cellular Community                          | Biofilm formation - Pseudomonas aeruginosa             | HLB444 | 2.099  | 0.002 | HLB444 | 2.215  | 0.001 | -      | -      | -     | -      | -      | -     | -    | -      | -     | -    | -      | -     | Chow   | -2.185 | 0.002 | Chow   | -2.281 | 0.002 |

|         |                                    |                                                  |        |        |       |        |        |       |        |        |       |        |        |       |        |        |       |        |        |       |        |        |       |        |        |       |
|---------|------------------------------------|--------------------------------------------------|--------|--------|-------|--------|--------|-------|--------|--------|-------|--------|--------|-------|--------|--------|-------|--------|--------|-------|--------|--------|-------|--------|--------|-------|
| ko02024 | Cellular Community                 | Quorum sensing                                   | HLB444 | 2.858  | 0.001 | HLB444 | 2.83   | 0.003 | B6     | -2.578 | 0.028 | B6     | -2.783 | 0.012 | HF     | 3.11   | 0.003 | HF     | 3.101  | 0.003 | -      | -      | -     | -      | -      | -     |
| ko02026 | Cellular Community                 | Biofilm formation - Escherichia coli             | HLB444 | 2.286  | 0.001 | HLB444 | 2.393  | 0.001 | -      | -      | -     | -      | -      | -     | -      | -      | -     | -      | -      | -     | Chow   | -2.422 | 0.002 | Chow   | -2.539 | 0.002 |
| ko01503 | Drug Resistance: Antimicrobial     | Cationic antimicrobial peptide (CAMP) resistance | B6     | -2.588 | 0.001 | B6     | -2.703 | 0.001 | -      | -      | -     | -      | -      | -     | Chow   | -2.649 | 0.003 | Chow   | -2.651 | 0.004 | -      | -      | -     | -      | -      | -     |
| ko01501 | Drug Resistance: Antimicrobial     | beta-Lactam resistance                           | B6     | -2.492 | 0.002 | B6     | -2.633 | 0.001 | B6     | -2.492 | 0.004 | B6     | -2.484 | 0.004 | HF     | 2.497  | 0.003 | HF     | 2.501  | 0.003 | HF     | 2.472  | 0.002 | HF     | 2.623  | 0.002 |
| ko01502 | Drug Resistance: Antimicrobial     | Vancomycin resistance                            | -      | -      | -     | B6     | -2.035 | 0.003 | -      | -      | -     | -      | -      | -     | HF     | 2.325  | 0.004 | HF     | 2.28   | 0.004 | HF     | 2.414  | 0.002 | HF     | 2.408  | 0.002 |
| ko01523 | Drug Resistance: Antineoplastic    | Antifolate resistance                            | -      | -      | -     | -      | -      | -     | HLB444 | 2.154  | 0.004 | HLB444 | 2.131  | 0.004 | -      | -      | -     | -      | -      | -     | -      | -      | -     | -      | -      | -     |
| ko03320 | Endocrine System                   | PPAR signaling pathway                           | -      | -      | -     | -      | -      | -     | -      | -      | -     | -      | -      | -     | Chow   | -2.442 | 0.003 | Chow   | -2.437 | 0.003 | Chow   | -2.234 | 0.002 | Chow   | -2.242 | 0.002 |
| ko00190 | Energy Metabolism                  | Oxidative phosphorylation                        | B6     | -2.862 | 0.001 | B6     | -2.967 | 0.001 | HLB444 | 2.703  | 0.028 | HLB444 | 2.8    | 0.028 | Chow   | -3.092 | 0.004 | Chow   | -3.1   | 0.004 | -      | -      | -     | -      | -      | -     |
| ko00720 | Energy Metabolism                  | Carbon fixation pathways in prokaryotes          | B6     | -2.169 | 0.039 | -      | -      | -     | HLB444 | 2.576  | 0.019 | HLB444 | 2.66   | 0.012 | Chow   | -2.72  | 0.007 | Chow   | -2.68  | 0.007 | -      | -      | -     | -      | -      | -     |
| ko00920 | Energy Metabolism                  | Sulfur metabolism                                | HLB444 | 2.364  | 0.001 | HLB444 | 2.419  | 0.001 | B6     | -2.089 | 0.028 | B6     | -2.25  | 0.019 | HF     | 2.614  | 0.003 | HF     | 2.608  | 0.003 | -      | -      | -     | -      | -      | -     |
| ko00710 | Energy Metabolism                  | Carbon fixation in photosynthetic organisms      | HLB444 | 2.054  | 0.009 | HLB444 | 2.135  | 0.002 | -      | -      | -     | -      | -      | -     | Chow   | -2.047 | 0.032 | Chow   | -2.025 | 0.032 | Chow   | -2.106 | 0.002 | Chow   | -2.187 | 0.002 |
| ko00680 | Energy Metabolism                  | Methane metabolism                               | HLB444 | 2.468  | 0.001 | HLB444 | 2.531  | 0.001 | HLB444 | 2.113  | 0.019 | HLB444 | 2.146  | 0.019 | -      | -      | -     | HF     | 2.182  | 0.032 | -      | -      | -     | -      | -      | -     |
| ko00195 | Energy Metabolism                  | Photosynthesis                                   | -      | -      | -     | -      | -      | -     | HLB444 | 2.081  | 0.012 | -      | -      | -     | Chow   | -2.394 | 0.003 | Chow   | -2.396 | 0.003 | -      | -      | -     | Chow   | -2.05  | 0.002 |
| ko00910 | Energy Metabolism                  | Nitrogen metabolism                              | -      | -      | -     | HLB444 | 2.024  | 0.013 | -      | -      | -     | -      | -      | -     | Chow   | -2.168 | 0.01  | Chow   | -2.127 | 0.007 | Chow   | -2.285 | 0.002 | Chow   | -2.438 | 0.002 |
| ko03060 | Folding, Sorting, and Degradation  | Protein export                                   | -      | -      | -     | -      | -      | -     | HLB444 | 2.025  | 0.004 | -      | -      | -     | Chow   | -2.267 | 0.003 | Chow   | -2.265 | 0.003 | Chow   | -2.185 | 0.002 | Chow   | -2.208 | 0.002 |
| ko03018 | Folding, Sorting, and Degradation  | RNA degradation                                  | -      | -      | -     | B6     | -2.044 | 0.03  | HLB444 | 2.179  | 0.007 | HLB444 | 2.111  | 0.028 | Chow   | -2.081 | 0.022 | -      | -      | -     | -      | -      | -     | HF     | 2.037  | 0.01  |
| ko01100 | Global Overview Maps               | Metabolic pathways                               | B6     | -3.314 | 0.003 | B6     | -3.324 | 0.003 | HLB444 | 3.221  | 0.028 | HLB444 | 3.343  | 0.028 | Chow   | -3.789 | 0.003 | Chow   | -3.784 | 0.003 | Chow   | -3.41  | 0.002 | Chow   | -3.289 | 0.002 |
| ko01110 | Global Overview Maps               | Biosynthesis of secondary metabolites            | B6     | -2.904 | 0.001 | B6     | -3.012 | 0.001 | -      | -      | -     | -      | -      | -     | -      | -      | -     | -      | -      | -     | -      | -      | -     | HF     | 2.825  | 0.002 |
| ko01120 | Global Overview Maps               | Microbial metabolism in diverse environments     | -      | -      | -     | -      | -      | -     | B6     | -2.592 | 0.019 | B6     | -2.501 | 0.019 | HF     | 3.272  | 0.003 | HF     | 3.247  | 0.003 | HF     | 3.192  | 0.002 | HF     | 3.158  | 0.002 |
| ko01230 | Global Overview Maps               | Biosynthesis of amino acids                      | -      | -      | -     | -      | -      | -     | B6     | -2.976 | 0.007 | B6     | -2.979 | 0.007 | HF     | 3.326  | 0.003 | HF     | 3.305  | 0.003 | HF     | 3.004  | 0.002 | HF     | 3.005  | 0.002 |
| ko01210 | Global Overview Maps               | 2-Oxocarboxylic acid metabolism                  | -      | -      | -     | -      | -      | -     | B6     | -2.631 | 0.004 | B6     | -2.574 | 0.007 | HF     | 2.919  | 0.003 | HF     | 2.905  | 0.003 | HF     | 2.589  | 0.002 | HF     | 2.653  | 0.002 |
| ko01220 | Global Overview Maps               | Degradation of aromatic compounds                | -      | -      | -     | -      | -      | -     | B6     | -2.446 | 0.004 | B6     | -2.416 | 0.004 | HF     | 2.445  | 0.003 | HF     | 2.419  | 0.003 | -      | -      | -     | -      | -      | -     |
| ko01200 | Global Overview Maps               | Carbon metabolism                                | -      | -      | -     | -      | -      | -     | HLB444 | 2.648  | 0.004 | HLB444 | 2.701  | 0.004 | HF     | 2.525  | 0.046 | HF     | 2.508  | 0.046 | HF     | 2.804  | 0.002 | HF     | 2.792  | 0.002 |
| ko01212 | Global Overview Maps               | Fatty acid metabolism                            | -      | -      | -     | -      | -      | -     | -      | -      | -     | -      | -      | Chow  | -2.431 | 0.003  | Chow  | -2.407 | 0.003  | Chow  | -2.228 | 0.014  | Chow  | -2.243 | 0.01   |       |
| ko00604 | Glycan Biosynthesis and Metabolism | Glycosphingolipid biosynthesis - ganglio series  | B6     | -2.542 | 0.001 | B6     | -2.598 | 0.001 | B6     | -2.084 | 0.004 | -      | -      | -     | HF     | 2.144  | 0.032 | HF     | 2.06   | 0.032 | HF     | 2.533  | 0.002 | HF     | 2.612  | 0.002 |
| ko00513 | Glycan Biosynthesis and Metabolism | Various types of N-glycan biosynthesis           | B6     | -2.55  | 0.001 | B6     | -2.604 | 0.001 | B6     | -2.094 | 0.004 | -      | -      | -     | HF     | 2.143  | 0.032 | HF     | 2.058  | 0.032 | HF     | 2.537  | 0.002 | HF     | 2.614  | 0.002 |
| ko00511 | Glycan Biosynthesis and Metabolism | Other glycan degradation                         | B6     | -2.916 | 0.001 | B6     | -2.957 | 0.001 | B6     | -2.501 | 0.007 | -      | -      | -     | -      | -      | -     | -      | -      | -     | HF     | 2.739  | 0.002 | HF     | 2.855  | 0.002 |

|         |                                      |                                                            |        |        |       |        |        |       |        |        |       |        |        |       |      |        |       |      |        |       |      |        |       |      |        |       |
|---------|--------------------------------------|------------------------------------------------------------|--------|--------|-------|--------|--------|-------|--------|--------|-------|--------|--------|-------|------|--------|-------|------|--------|-------|------|--------|-------|------|--------|-------|
| ko00531 | Glycan Biosynthesis and Metabolism   | Glycosaminoglycan degradation                              | B6     | -2.685 | 0.001 | B6     | -2.75  | 0.001 | B6     | -2.319 | 0.004 | B6     | -2.117 | 0.007 | HF   | 2.499  | 0.003 | HF   | 2.437  | 0.01  | HF   | 2.741  | 0.002 | HF   | 2.819  | 0.002 |
| ko00603 | Glycan Biosynthesis and Metabolism   | Glycosphingolipid biosynthesis - globo and isoglobo series | B6     | -2.548 | 0.001 | B6     | -2.634 | 0.001 | B6     | -2.012 | 0.004 | -      | -      | -     | HF   | 2.147  | 0.022 | HF   | 2.039  | 0.032 | HF   | 2.565  | 0.002 | HF   | 2.645  | 0.002 |
| ko00540 | Glycan Biosynthesis and Metabolism   | Lipopolysaccharide biosynthesis                            | B6     | -2.746 | 0.002 | B6     | -2.826 | 0.002 | HLB444 | 2.571  | 0.042 | HLB444 | 2.717  | 0.019 | Chow | -3.121 | 0.003 | Chow | -3.116 | 0.003 | Chow | -2.653 | 0.003 | -    | -      | -     |
| ko00510 | Glycan Biosynthesis and Metabolism   | N-Glycan biosynthesis                                      | -      | -      | -     | -      | -      | -     | -      | -      | -     | -      | -      | -     | Chow | -2.063 | 0.003 | Chow | -2.059 | 0.003 | Chow | -2.035 | 0.002 | Chow | -2.076 | 0.002 |
| ko00601 | Glycan Biosynthesis and Metabolism   | Glycosphingolipid biosynthesis - lacto and neolacto series | -      | -      | -     | -      | -      | -     | -      | -      | -     | -      | -      | -     | -    | -      | -     | Chow | -2.282 | 0.003 | -    | -      | -     | -    | -      | -     |
| ko00600 | Lipid Metabolism                     | Sphingolipid metabolism                                    | B6     | -2.579 | 0.001 | B6     | -2.677 | 0.001 | -      | -      | -     | -      | -      | -     | -    | -      | -     | -    | -      | -     | HF   | 2.443  | 0.002 | HF   | 2.567  | 0.002 |
| ko00061 | Lipid Metabolism                     | Fatty acid biosynthesis                                    | B6     | -2.168 | 0.023 | B6     | -2.141 | 0.03  | -      | -      | -     | -      | -      | -     | Chow | -2.546 | 0.003 | Chow | -2.537 | 0.003 | Chow | -2.245 | 0.005 | Chow | -2.208 | 0.007 |
| ko00564 | Lipid Metabolism                     | Glycerophospholipid metabolism                             | HLB444 | 2.344  | 0.001 | HLB444 | 2.161  | 0.003 | -      | -      | -     | -      | -      | -     | -    | -      | -     | -    | -      | -     | Chow | -2.201 | 0.003 | Chow | -2.065 | 0.007 |
| ko00561 | Lipid Metabolism                     | Glycerolipid metabolism                                    | -      | -      | -     | -      | -      | -     | -      | -      | -     | B6     | -2.201 | 0.042 | HF   | 2.58   | 0.003 | HF   | 2.577  | 0.003 | HF   | 2.381  | 0.003 | HF   | 2.287  | 0.005 |
| ko00072 | Lipid Metabolism                     | Synthesis and degradation of ketone bodies                 | -      | -      | -     | -      | -      | -     | -      | -      | -     | -      | -      | -     | HF   | 2.002  | 0.003 | HF   | 2.028  | 0.003 | -    | -      | -     | -    | -      | -     |
| ko01040 | Lipid Metabolism                     | Biosynthesis of unsaturated fatty acids                    | -      | -      | -     | -      | -      | -     | -      | -      | -     | -      | -      | -     | -    | -      | -     | -    | -      | -     | Chow | -2.033 | 0.002 | -    | -      | -     |
| ko00120 | Lipid Metabolism                     | Primary bile acid biosynthesis                             | -      | -      | -     | -      | -      | -     | -      | -      | -     | -      | -      | -     | -    | -      | -     | -    | -      | -     | -    | -      | -     | Chow | -2.094 | 0.002 |
| ko00121 | Lipid Metabolism                     | Secondary bile acid biosynthesis                           | -      | -      | -     | -      | -      | -     | -      | -      | -     | -      | -      | -     | -    | -      | -     | -    | -      | -     | -    | -      | -     | Chow | -2.094 | 0.002 |
| ko02060 | Membrane Transport                   | Phosphotransferase system (PTS)                            | HLB444 | 2.627  | 0.013 | HLB444 | 2.608  | 0.03  | -      | -      | -     | B6     | -2.249 | 0.042 | HF   | 2.915  | 0.003 | HF   | 2.921  | 0.003 | HF   | 2.427  | 0.01  | HF   | 2.396  | 0.007 |
| ko02010 | Membrane Transport                   | ABC transporters                                           | HLB444 | 3.413  | 0.001 | HLB444 | 3.433  | 0.001 | B6     | -3.098 | 0.042 | B6     | -3.255 | 0.028 | HF   | 3.698  | 0.003 | HF   | 3.689  | 0.003 | HF   | 3.119  | 0.02  | -    | -      | -     |
| ko03070 | Membrane Transport                   | Bacterial secretion system                                 | -      | -      | -     | B6     | -2.023 | 0.03  | -      | -      | -     | -      | -      | -     | -    | -      | -     | -    | -      | -     | HF   | 2      | 0.02  | HF   | 2.134  | 0.007 |
| ko00740 | Metabolism of Cofactors and Vitamins | Riboflavin metabolism                                      | B6     | -2.273 | 0.007 | B6     | -2.062 | 0.039 | -      | -      | -     | HLB444 | 2.351  | 0.028 | Chow | -2.635 | 0.003 | Chow | -2.611 | 0.003 | -    | -      | -     | -    | -      | -     |
| ko00130 | Metabolism of Cofactors and Vitamins | Ubiquinone and other terpenoid-quinone biosynthesis        | B6     | -2.461 | 0.002 | B6     | -2.544 | 0.002 | HLB444 | 2.228  | 0.042 | HLB444 | 2.385  | 0.019 | Chow | -2.738 | 0.003 | Chow | -2.724 | 0.003 | Chow | -2.081 | 0.037 | -    | -      | -     |
| ko00730 | Metabolism of Cofactors and Vitamins | Thiamine metabolism                                        | B6     | -2.427 | 0.002 | B6     | -2.416 | 0.001 | HLB444 | 2.06   | 0.042 | HLB444 | 2.157  | 0.028 | Chow | -2.553 | 0.004 | Chow | -2.545 | 0.003 | -    | -      | -     | -    | -      | -     |
| ko00790 | Metabolism of Cofactors and Vitamins | Folate biosynthesis                                        | B6     | -2.563 | 0.002 | B6     | -2.6   | 0.002 | HLB444 | 2.497  | 0.019 | HLB444 | 2.581  | 0.012 | Chow | -2.917 | 0.003 | Chow | -2.911 | 0.003 | -    | -      | -     | -    | -      | -     |
| ko00780 | Metabolism of Cofactors and Vitamins | Biotin metabolism                                          | B6     | -2.416 | 0.003 | B6     | -2.473 | 0.002 | HLB444 | 2.297  | 0.028 | HLB444 | 2.441  | 0.019 | Chow | -2.773 | 0.003 | Chow | -2.77  | 0.003 | -    | -      | -     | -    | -      | -     |
| ko00785 | Metabolism of Cofactors and Vitamins | Lipoic acid metabolism                                     | B6     | -2.001 | 0.001 | B6     | -2.102 | 0.001 | -      | -      | -     | -      | -      | -     | -    | -      | -     | -    | -      | -     | -    | -      | -     | HF   | 2.101  | 0.002 |
| ko00860 | Metabolism of Cofactors and Vitamins | Porphyrin and chlorophyll metabolism                       | B6     | -2.583 | 0.017 | B6     | -2.584 | 0.009 | B6     | -2.52  | 0.004 | B6     | -2.313 | 0.028 | HF   | 2.931  | 0.003 | HF   | 2.859  | 0.003 | HF   | 2.976  | 0.002 | HF   | 2.975  | 0.002 |
| ko00770 | Metabolism of Cofactors and Vitamins | Pantothenate and CoA biosynthesis                          | B6     | -2.141 | 0.001 | B6     | -2.19  | 0.001 | -      | -      | -     | -      | -      | -     | -    | -      | -     | -    | -      | -     | -    | -      | -     | HF   | 2.012  | 0.002 |
| ko00760 | Metabolism of Cofactors and Vitamins | Nicotinate and nicotinamide metabolism                     | -      | -      | -     | -      | -      | -     | HLB444 | 2.314  | 0.004 | HLB444 | 2.243  | 0.007 | Chow | -2.602 | 0.003 | Chow | -2.577 | 0.003 | Chow | -2.207 | 0.002 | Chow | -2.406 | 0.002 |

|         |                                           |                                               |        |        |       |        |        |       |        |        |       |        |        |       |        |        |       |        |        |       |        |        |       |        |        |       |
|---------|-------------------------------------------|-----------------------------------------------|--------|--------|-------|--------|--------|-------|--------|--------|-------|--------|--------|-------|--------|--------|-------|--------|--------|-------|--------|--------|-------|--------|--------|-------|
| ko00750 | Metabolism of Cofactors and Vitamins      | Vitamin B6 metabolism                         | -      | -      | -     | -      | -      | -     | -      | -      | -     | HLB444 | 2.055  | 0.012 | Chow   | -2.348 | 0.003 | Chow   | -2.337 | 0.003 | Chow   | -2.088 | 0.002 | -      | -      | -     |
| ko00830 | Metabolism of Cofactors and Vitamins      | Retinol metabolism                            | -      | -      | -     | -      | -      | -     | -      | -      | -     | -      | -      | -     | HF     | 2.056  | 0.003 | HF     | 2.07   | 0.003 | -      | -      | -     | -      | -      | -     |
| ko00909 | Metabolism of Terpenoids and Polyketides  | Sesquiterpenoid and triterpenoid biosynthesis | B6     | -2.124 | 0.001 | B6     | -2.342 | 0.001 | -      | -      | -     | -      | -      | -     | -      | -      | -     | -      | -      | -     | HF     | 2.195  | 0.002 | HF     | 2.398  | 0.002 |
| ko00523 | Metabolism of Terpenoids and Polyketides  | Polyketide sugar unit biosynthesis            | -      | -      | -     | -      | -      | -     | -      | -      | -     | HLB444 | 2.155  | 0.028 | Chow   | -2.692 | 0.003 | Chow   | -2.678 | 0.003 | Chow   | -2.54  | 0.002 | Chow   | -2.517 | 0.002 |
| ko00908 | Metabolism of Terpenoids and Polyketides  | Zeatin biosynthesis                           | -      | -      | -     | -      | -      | -     | -      | -      | -     | -      | -      | -     | Chow   | -2.06  | 0.003 | Chow   | -2.049 | 0.003 | -      | -      | -     | -      | -      | -     |
| ko00900 | Metabolism of Terpenoids and Polyketides  | Terpenoid backbone biosynthesis               | -      | -      | -     | -      | -      | -     | -      | -      | -     | -      | -      | -     | Chow   | -2.181 | 0.007 | Chow   | -2.159 | 0.01  | Chow   | -2.034 | 0.002 | Chow   | -2.172 | 0.002 |
| ko01051 | Metabolism of Terpenoids and Polyketides  | Biosynthesis of ansamycins                    | -      | -      | -     | -      | -      | -     | -      | -      | -     | -      | -      | -     | HF     | 2.258  | 0.003 | HF     | 2.254  | 0.003 | -      | -      | -     | -      | -      | -     |
| ko00903 | Metabolism of Terpenoids and Polyketides  | Limonene and pinene degradation               | -      | -      | -     | -      | -      | -     | -      | -      | -     | -      | -      | -     | HF     | 2.007  | 0.003 | HF     | 2.009  | 0.003 | -      | -      | -     | -      | -      | -     |
| ko00230 | Nucleotide Metabolism                     | Purine metabolism                             | -      | -      | -     | -      | -      | -     | HLB444 | 2.752  | 0.004 | HLB444 | 2.652  | 0.007 | Chow   | -2.901 | 0.003 | Chow   | -2.849 | 0.003 | -      | -      | -     | Chow   | -2.414 | 0.037 |
| ko00240 | Nucleotide Metabolism                     | Pyrimidine metabolism                         | -      | -      | -     | -      | -      | -     | HLB444 | 2.736  | 0.028 | HLB444 | 2.711  | 0.019 | Chow   | -3.083 | 0.003 | Chow   | -3.047 | 0.003 | Chow   | -2.784 | 0.002 | Chow   | -2.884 | 0.002 |
| ko03410 | Replication and Repair                    | Base excision repair                          | HLB444 | 2.204  | 0.002 | HLB444 | 2.131  | 0.003 | -      | -      | -     | -      | -      | -     | Chow   | -2.2   | 0.004 | Chow   | -2.172 | 0.004 | Chow   | -2.495 | 0.002 | Chow   | -2.478 | 0.002 |
| ko03030 | Replication and Repair                    | DNA replication                               | -      | -      | -     | -      | -      | -     | HLB444 | 2.179  | 0.019 | -      | -      | -     | Chow   | -2.424 | 0.007 | Chow   | -2.41  | 0.003 | Chow   | -2.124 | 0.01  | Chow   | -2.307 | 0.002 |
| ko03430 | Replication and Repair                    | Mismatch repair                               | -      | -      | -     | -      | -      | -     | HLB444 | 2.378  | 0.004 | HLB444 | 2.199  | 0.042 | Chow   | -2.653 | 0.003 | Chow   | -2.629 | 0.003 | Chow   | -2.512 | 0.002 | Chow   | -2.617 | 0.002 |
| ko03440 | Replication and Repair                    | Homologous recombination                      | -      | -      | -     | -      | -      | -     | -      | -      | -     | -      | -      | Chow  | -2.279 | 0.015  | Chow  | -2.284 | 0.015  | Chow  | -2.149 | 0.005  | Chow  | -2.412 | 0.002  |       |
| ko03420 | Replication and Repair                    | Nucleotide excision repair                    | -      | -      | -     | -      | -      | -     | -      | -      | -     | -      | -      | Chow  | -2.189 | 0.003  | Chow  | -2.214 | 0.003  | -     | -      | -      | -     | -      | -      |       |
| ko02020 | Signal Transduction                       | Two-component system                          | HLB444 | 3.071  | 0.007 | HLB444 | 3.056  | 0.007 | B6     | -2.989 | 0.028 | B6     | -3.069 | 0.028 | HF     | 3.475  | 0.004 | HF     | 3.456  | 0.004 | HF     | 2.974  | 0.027 | -      | -      | -     |
| ko03010 | Translation                               | Ribosome                                      | B6     | -2.486 | 0.005 | B6     | -2.535 | 0.009 | HLB444 | 2.758  | 0.042 | -      | -      | -     | Chow   | -3.099 | 0.003 | Chow   | -3.108 | 0.003 | Chow   | -2.634 | 0.003 | Chow   | -2.844 | 0.003 |
| ko03013 | Translation                               | RNA transport                                 | -      | -      | -     | -      | -      | -     | -      | -      | -     | -      | -      | Chow  | -2.32  | 0.003  | Chow  | -2.294 | 0.003  | Chow  | -2.202 | 0.002  | Chow  | -2.218 | 0.002  |       |
| ko03015 | Translation                               | mRNA surveillance pathway                     | -      | -      | -     | -      | -      | -     | -      | -      | -     | -      | -      | Chow  | -2.165 | 0.004  | Chow  | -2.947 | 0.003  | -     | -      | -      | -     | -      | -      | -     |
| ko03008 | Translation                               | Ribosome biogenesis in eukaryotes             | -      | -      | -     | -      | -      | -     | -      | -      | -     | -      | -      | -     | -      | -      | -     | -      | -      | -     | -      | -      | -     | HF     | 2.014  | 0.002 |
| ko00362 | Xenobiotics Biodegradation and Metabolism | Benzoate degradation                          | -      | -      | -     | -      | -      | -     | B6     | -2.319 | 0.004 | B6     | -2.287 | 0.004 | HF     | 2.466  | 0.003 | HF     | 2.456  | 0.003 | -      | -      | -     | -      | -      | -     |
| ko00791 | Xenobiotics Biodegradation and Metabolism | Atrazine degradation                          | -      | -      | -     | -      | -      | -     | HLB444 | 2.334  | 0.004 | HLB444 | 2.324  | 0.004 | Chow   | -2.454 | 0.003 | Chow   | -2.438 | 0.003 | -      | -      | -     | -      | -      | -     |
| ko00983 | Xenobiotics Biodegradation and Metabolism | Drug metabolism - other enzymes               | -      | -      | -     | -      | -      | -     | -      | -      | -     | -      | -      | Chow  | -2.601 | 0.003  | Chow  | -2.572 | 0.003  | Chow  | -2.626 | 0.002  | Chow  | -2.672 | 0.002  |       |
| ko00626 | Xenobiotics Biodegradation and Metabolism | Naphthalene degradation                       | -      | -      | -     | -      | -      | -     | -      | -      | -     | -      | -      | HF    | 2.062  | 0.003  | HF    | 2.064  | 0.003  | -     | -      | -      | -     | -      | -      |       |
| ko00363 | Xenobiotics Biodegradation and Metabolism | Bisphenol degradation                         | -      | -      | -     | -      | -      | -     | -      | -      | -     | -      | -      | HF    | 2.269  | 0.003  | HF    | 2.292  | 0.015  | -     | -      | -      | -     | -      | -      |       |

|         |                                           |                                           |   |   |   |   |   |   |   |   |   |   |   |   |   |    |      |       |    |       |       |    |       |       |    |       |       |
|---------|-------------------------------------------|-------------------------------------------|---|---|---|---|---|---|---|---|---|---|---|---|---|----|------|-------|----|-------|-------|----|-------|-------|----|-------|-------|
| ko00633 | Xenobiotics Biodegradation and Metabolism | Nitrotoluene degradation                  | - | - | - | - | - | - | - | - | - | - | - | - | - | HF | 2.13 | 0.003 | HF | 2.127 | 0.003 | HF | 2.129 | 0.002 | HF | 2.151 | 0.002 |
| ko00625 | Xenobiotics Biodegradation and Metabolism | Chloroalkane and chloroalkene degradation | - | - | - | - | - | - | - | - | - | - | - | - | - | -  | -    | -     | HF | 2.009 | 0.003 | -  | -     | -     | -  | -     | -     |
